# Supplementary material for: Exposure to heavy physical work from early to later adulthood and primary healthcare visits due to musculoskeletal diseases in midlife: a register linked study
Source: PubMed Central journal article supplement — BMJ Open. 2019 Aug 27;9(8):e031564. doi: 10.1136/bmjopen-2019-031564 (PMC6720465; doi:10.1136/bmjopen-2019-031564), 2019-08-27
Supplement: bmjopen-2019-031564.draft_revisions.pdf [file bmjopen-2019-031564.draft_revisions.pdf]

# BMJ Open

BMJ Open is committed to open peer review. As part of this commitment we make the peer review history of every article we publish publicly available.

When an article is published we post the peer reviewers' comments and the authors' responses online. We also post the versions of the paper that were used during peer review. These are the versions that the peer review comments apply to.

The versions of the paper that follow are the versions that were submitted during the peer review process. They are not the versions of record or the final published versions. They should not be cited or distributed as the published version of this manuscript.

BMJ Open is an open access journal and the full, final, typeset and author-corrected version of record of the manuscript is available on our site with no access controls, subscription charges or pay-per-view fees (<http://bmjopen.bmj.com>).

If you have any questions on BMJ Open's open peer review process please email [info.bmjopen@bmj.com](mailto:info.bmjopen@bmj.com)

# BMJ Open

## Exposure to heavy physical work from early to later adulthood and primary health care visits due to musculoskeletal diseases in midlife: a register linked study

|                               |                                                                                                                                                                                                                                                                                                                                                                                                                                                                                                                                                                                                                                                                                                                                                                                                                                                                                                                                                                                                                                                                                                                                               |
|-------------------------------|-----------------------------------------------------------------------------------------------------------------------------------------------------------------------------------------------------------------------------------------------------------------------------------------------------------------------------------------------------------------------------------------------------------------------------------------------------------------------------------------------------------------------------------------------------------------------------------------------------------------------------------------------------------------------------------------------------------------------------------------------------------------------------------------------------------------------------------------------------------------------------------------------------------------------------------------------------------------------------------------------------------------------------------------------------------------------------------------------------------------------------------------------|
| Journal:                      | <i>BMJ Open</i>                                                                                                                                                                                                                                                                                                                                                                                                                                                                                                                                                                                                                                                                                                                                                                                                                                                                                                                                                                                                                                                                                                                               |
| Manuscript ID                 | bmjopen-2019-031564                                                                                                                                                                                                                                                                                                                                                                                                                                                                                                                                                                                                                                                                                                                                                                                                                                                                                                                                                                                                                                                                                                                           |
| Article Type:                 | Research                                                                                                                                                                                                                                                                                                                                                                                                                                                                                                                                                                                                                                                                                                                                                                                                                                                                                                                                                                                                                                                                                                                                      |
| Date Submitted by the Author: | 10-May-2019                                                                                                                                                                                                                                                                                                                                                                                                                                                                                                                                                                                                                                                                                                                                                                                                                                                                                                                                                                                                                                                                                                                                   |
| Complete List of Authors:     | <p>Halonen, Jaana; Finnish Institute of Occupational Health<br/>           Shiri, Rahman; Finnish Institute of Occupational Health, Centre of Expertise for Health and Work Abili<br/>           Mänty, Minna; University of Helsinki, Department of Public Health<br/>           Sumanen, Hilla; South-Eastern Finland University of Applied Sciences, Health care and emergency care; University of Helsinki, Public Health<br/>           Solovieva, Svetlana; Finnish Institute of Occupational Health, Center of Expertise for Health and workability<br/>           Viikari-Juntura, Eira; Finnish Institute of Occupational Health,<br/>           Kahonen, Mika; University of Tampere , Department of Clinical Physiology; Tampere University Hospital<br/>           Lehtimäki, Terho<br/>           Raitakari, Olli; University of Turku, Research Centre of Applied and Preventive Cardiovascular Medicine; Turku University Hospital, Department of Clinical Physiology and Nuclear Medicine<br/>           Lallukka, Tea; Työterveyslaitos, ; Helsingin Yliopisto Laaketieteellinen tiedekunta, Department of Public Health</p> |
| Keywords:                     | Musculoskeletal disorders < ORTHOPAEDIC & TRAUMA SURGERY, Physical work, Spine < ORTHOPAEDIC & TRAUMA SURGERY, Upper extremity, OCCUPATIONAL & INDUSTRIAL MEDICINE                                                                                                                                                                                                                                                                                                                                                                                                                                                                                                                                                                                                                                                                                                                                                                                                                                                                                                                                                                            |
|                               |                                                                                                                                                                                                                                                                                                                                                                                                                                                                                                                                                                                                                                                                                                                                                                                                                                                                                                                                                                                                                                                                                                                                               |

SCHOLARONE™  
Manuscripts

1  
2  
3 *Research article: BMJ Open*  
4

5 Exposure to heavy physical work from early to later adulthood and primary  
6 health care visits due to musculoskeletal diseases in midlife: a register linked  
7  
8 study  
9  
10  
11  
12

13 Jaana I. Halonen,<sup>1</sup> Rahman Shiri,<sup>1</sup> Minna Mänty,<sup>2,3</sup> Hilla Sumanen,<sup>3,4</sup> Svetlana Solovieva,<sup>1</sup>

14 Eira Viikari-Juntura,<sup>1</sup> Mika Kähönen,<sup>5</sup> Terho Lehtimäki,<sup>6</sup> Olli T. Raitakari,<sup>7,8,9</sup> Tea

15 Lallukka<sup>1,3</sup>  
16  
17  
18  
19

20 1 Finnish Institute of Occupational Health, Helsinki, Finland

21 2 City of Vantaa, Finland

22 3 Department of Public Health, University of Helsinki, Helsinki, Finland

23 4 South-Eastern Finland University of Applied Sciences, Kotka, Finland

24 5 Department of Clinical Physiology, Tampere University Hospital, and Finnish  
25 Cardiovascular Research Center - Tampere, Faculty of Medicine and Health Technology,  
26 Tampere University, Tampere 33521, Finland

27 6 Department of Clinical Chemistry, Fimlab Laboratories, and Finnish Cardiovascular  
28 Research Center - Tampere, Faculty of Medicine and Health Technology, Tampere  
29 University, Tampere 33520, Finland

30 7 Centre for Population Health Research, University of Turku and Turku University Hospital,  
31 Turku, Finland.

32 8 Research Centre of Applied and Preventive Cardiovascular Medicine, University of Turku,  
33 Turku, Finland.

34 9 Department of Clinical Physiology and Nuclear Medicine, Turku University Hospital,  
35 Turku, Finland.  
36  
37  
38  
39  
40

41 Corresponding author: Jaana I. Halonen, address: Finnish Institute of Occupational Health,  
42 70032 TYÖTERVEYSLAITOS, Finland  
43  
44

45 E-mail: [jaana.halonen@ttl.fi](mailto:jaana.halonen@ttl.fi) Telephone: +358 43 82 44 264  
46  
47  
48  
49

50 **Running title** Physical work from early to later adulthood and musculoskeletal visits  
51  
52

53 **Word count** 2437  
54  
55  
56  
57  
58  
59  
60

## Abstract (258/300)

**Objectives:** To examine whether exposure to heavy physical work from early to later adulthood is associated with primary health care visits due to cause-specific musculoskeletal diseases in midlife.

**Design:** Prospective cohort study

**Setting:** Nationally representative Young Finns Study cohort, Finland.

**Participants:** 1061 participants of the Young Finns Study cohort.

**Exposure measure:** Physical work exposure was surveyed in early (18–24 years old, 1986 or 1989) and later adulthood (2007 and 2011), and it was categorized as: “no exposure”, “early exposure only”, “later exposure only”, and “early and later exposure”.

**Primary and secondary outcome measures:** Visits due to any musculoskeletal disease and separately due to spine disorders, and upper extremity disorders were followed-up from national primary health care register from the date of the third survey in 2011 until 2014.

**Results:** Those with physically heavy work in early adulthood only had an increased risk of any musculoskeletal disease (risk ratio (RR) 1.55, 95% confidence interval (CI) 1.05–2.28) after adjustment for age, sex, smoking, body mass index, physical activity, and parental occupational class. Later exposure only was associated with visits due to any musculoskeletal disease (RR 1.46, 95% CI 1.01–2.12) and spine disorders (RR 2.40, 95% CI 1.41–4.06). Early and later exposure was associated with all three outcomes: RRs 1.99 (95% CI 1.44–2.77) for any musculoskeletal disease, 2.43 (95% CI 1.42–4.14) for spine disorders, and 3.97 (95% CI 1.86–8.46) for upper extremity disorders.

**Conclusions:** To reduce burden of musculoskeletal diseases, preventive actions to reduce exposure to or mitigate the consequences of physically heavy work throughout the work career are needed.

**Key words:** musculoskeletal; physical work; spine disorder; upper extremity

### Strengths and limitations of this study

- We used self-reported assessment of physical heaviness of work that was based on a single question, which is why the specificity of the exposure, e.g. regarding exposure of different parts of the body, is low.
- We cannot rule out the possibility of changes in the exposure or outcomes between the survey waves.
- The setting enabled us to prospectively examine the long-term consequences of exposure to early and later physical work and midlife musculoskeletal health problems that were objectively measured.
- The used cohort data were representative of the general population with relatively little loss to follow-up.

## Introduction

Musculoskeletal diseases (MSD) are the leading cause of work disability<sup>1</sup> measured as sickness absence<sup>2</sup> and disability retirements.<sup>3</sup> In the European Union, the estimated total cost of lost productivity attributable to MSD among working-aged people can be up to 2% of gross domestic product (GDP).<sup>4</sup> Contextual factors, particularly those related to workplace, have been identified as risk factors for sickness absence and disability retirement due to musculoskeletal problems<sup>5,6</sup> as well as for musculoskeletal pain.<sup>7</sup> We have reported findings where early and cumulative exposure to physical work were associated with low back pain at midlife.<sup>8</sup> However, pain as an outcome is always self-reported, as well as a common condition. Thus, objective outcome measures are needed to confirm whether the effects of early and cumulative physical work are similar for more severe and objectively assessed MSD outcomes.

Only few studies to date have been able to assess the associations between cumulative exposure to physical work and MSD. A recent study used a job exposure matrix to assess exposure at the level of occupational title and disability retirement due to MSD,<sup>6</sup> but even the first exposure measurements were mainly from midlife. In another study, two individual-level measurements were used to examine the associations between long-term exposure to high physical workload in midlife and risk of disability retirement due to MSD after age of 61,<sup>9</sup> while younger employees were not included. Yet another study used individual-level physical work exposure data that were retrospectively assessed, and observed that cumulative exposure may increase the risk of sickness absence and disability retirement, but results for cause-specific outcomes were not reported.<sup>10</sup> In addition to the lack of cumulative exposure data, prior studies have rarely accounted for family background although parental socioeconomic position has been linked, for example, to later musculoskeletal problems<sup>11</sup> and widespread pain.<sup>12</sup>

1  
2  
3 To fill these gaps in evidence, we examined whether physical heaviness of work  
4  
5 from early adulthood to later adulthood is associated with primary health care visits due to  
6  
7 MSD in midlife. Any MSD was examined as one outcome group, but we also included two  
8  
9 cause-specific groups: disorders of the spine and upper extremities. The contribution of  
10  
11 behavioural factors and parental socioeconomic position in these associations were  
12  
13  
14 considered.

## 15 16 17 18 19 **Methods**

### 20 21 **Participants**

22  
23 Data for this study are derived from the Young Finns Study.<sup>13</sup> Cohort baseline data were  
24  
25 collected in 1980 in six age strata: 3, 6, 9, 12, 15, and 18 years resulting in 3596 participants  
26  
27 (response rate 83%). For this study, we included all those who were 18, 21 or 24 years when  
28  
29 responding to the survey in 1986 (wave 1). The wave 1 data were completed by including  
30  
31 also those who turned 18 years and responded to the survey in 1989 (**Figure 1**). The age-  
32  
33 based selection criterion was applied as the focus of this study was on early work-related  
34  
35 exposures. Further inclusion criterion required that the participants responded to the question  
36  
37 on physical heaviness of work in 1986 or 1989 (wave 1, early adulthood exposure), and in  
38  
39 2007 (wave 2, later adulthood exposure) and/or in 2011 (wave 3, later adulthood exposure),  
40  
41 which resulted in a total of 1170 participants. After excluding those with no follow-up or with  
42  
43 missing data on any covariate, the final study sample was 1170 cohort participants who all  
44  
45 had work exposure measurement from wave 1. Of these participants, 1023 had work  
46  
47 exposure data also from 2007, and 978 had work exposure data also from 2011. The study  
48  
49 has been ethically approved by the Ethics Committee of the Hospital District of Southwest  
50  
51 Finland.  
52  
53  
54  
55  
56  
57  
58  
59  
60

### Patient and Public Involvement statement

Patients or the public were not involved in the development of the research question or the design of this study nor in the conduct of the study.

### Exposure

Physical heaviness of work was enquired at waves 1 to 3 with a single question: “How heavy is your work physically?”. There were six response alternatives: 1) light sedentary work, 2) other sedentary work, 3) physically light work, involving standing and moving, 4) medium heavy work involving moving, 5) physically heavy work, and 6) physically very heavy work. The responses were categorized as: sedentary/physically light work, and medium to heavy physical work. We used responses from all three waves to form a five-class exposure variable categorized as: “no exposure”, when reporting sedentary/physically light work in all three waves, “early exposure only”, when reporting medium to heavy physical work only in wave 1, “later exposure only”, when reporting medium to heavy physical work in waves 2 or 3 (89% responded to both waves 2 and 3), and “early and later exposure” when reporting medium to heavy physical work in wave 1 and in later adulthood in wave 2 and/or 3. All other possible response combinations formed a group “inconsistent exposure”.

### Outcomes

We examined primary health care visits due to a musculoskeletal diagnosis. The follow-up started from the day after returning wave 3 survey in 2011, and continued until the first primary health care visit, death (from Statistics Finland) or end of the follow-up (end of 2014), whichever occurred first. Data were obtained from the register of primary health care visits (Avohilmo) maintained by National Institute for Health and Welfare.<sup>14</sup> Diagnosis-specific data have been collected and were available from 2011 onwards. Visits due to *any*



1  
2  
3 *musculoskeletal diagnosis* by International Classification of Diseases (ICD) version 10 codes  
4  
5 M00-M99 were examined over the follow-up period. Additionally, two cause-specific  
6  
7 outcome groups with the largest numbers of events were: 1) disorders of the spine and 2)  
8  
9 upper extremity disorders. *Disorders of the spine* included any of the following diseases,  
10  
11 surgeries or treatments (ICD-10 code): cervical disc disorders (M50), lumbar and other  
12  
13 intervertebral disc disorders with radiculopathy (M51.1), other specified intervertebral disc  
14  
15 displacement (M51.2), disc degeneration (M51.3), disc disorders (M51.8), intervertebral disc  
16  
17 disorder, unspecified (M51.9), disc disorder/ disc disease (back disorders with radiation:  
18  
19 M50, M51), other dorsopathies (M53), back pain / dorsalgia (back disorders without  
20  
21 radiation: M54.1, M54.2, M54.3, M54.4, M54.5, M54.6, M54.8, M54.9), and lumbar disc  
22  
23 herniation or sciatica (M51.1, M51.2, M54.3, and M54.4). *Upper extremity disorders*  
24  
25 included any of the following diseases, surgeries or treatments: carpal tunnel syndrome,  
26  
27 carpal tunnel release (G56.0, ACC51, ACC59), shoulder disorder (M75), medial  
28  
29 epicondylitis, lateral epicondylitis, and periarthrititis of wrist (M77.0, M77.1, M77.2, or  
30  
31 M77.3). Additionally, the numbers of visits due to osteoarthritis (M15, M16, M17, M18)  
32  
33 were examined, but found to be too low for statistical analyses (see Table 1).  
34  
35  
36  
37  
38  
39  
40  
41  
42

#### 43 Covariates

44 From the questionnaires we obtained information on possible confounders. We included sex  
45  
46 and age at wave 1, and parental occupational status in childhood (1=upper non-manual,  
47  
48 2=lower non-manual, 3=upper manual, 4=lower manual). Smoking (ever smoker vs. non-  
49  
50 smoker) and body mass index (BMI, kg/m<sup>2</sup> based on measured weight and height) were  
51  
52 included as time varying covariates collected at baseline, 2001, 2007 and 2011. Measure for  
53  
54 physical activity (PA) was based on a set of questions requesting the frequency and intensity  
55  
56 of PA, frequency of vigorous PA, hours spent on vigorous PA, average duration of a PA  
57  
58  
59  
60

1  
2  
3 session, and participation in organized PA. Based on these questions a *physical activity index*  
4 was calculated (range 5-15, larger value indicating greater activity).<sup>15</sup> For PA, we used the  
5 maximum of the three measurements of the PA index in adulthood (2001, 2007 and 2011), as  
6 these data had plenty of missing values, but the patterns of PA have been observed to remain  
7 constant in adulthood.<sup>16</sup> Missing data on covariates were imputed using mean of the study  
8 sample in the corresponding survey. All these covariates have been linked to back problems  
9 in prior studies.<sup>11 17-19</sup>

### 21 Statistical analyses

22 We used generalized estimating equation models with Poisson distribution to assess  
23 associations between the five-class physical work exposure, “no exposure” serving as the  
24 reference group, and primary health care visits due to MSD. We ran models separately for all  
25 musculoskeletal visits, for disorders of the spine, and for upper extremity disorders. Two  
26 model specifications were used: Model 1 was adjusted for sex and age at baseline, Model 2  
27 was additionally adjusted for parental occupational class and time-varying smoking, BMI and  
28 physical activity. Results are presented as risk ratios (RR) with 95% confidence intervals  
29 (CI). As an alternative method, we ran the analyses using Cox proportional models, which  
30 resulted in very similar findings (data not shown).

### 47 Results

48 Descriptive statistics of the analysis sample in total and by sex are shown in Table 1. At  
49 baseline, mean age was 20.5 (SD=2.9) years, and mean BMI 22.4 (SD=2.3), while the mean  
50 BMI during the follow-up was 25.5 (SD=4.8). Mean follow-up time for first visits due to any  
51 MSD was 3.2 (SD=0.87) years, due to spine disorders 3.4 (SD=0.63) years, and due to upper  
52 extremity disorders 3.4 (SD=0.50) years. Distributions of the outcomes and proportions of  
53  
54  
55  
56  
57  
58  
59  
60

1  
2  
3 events in each of the five exposure groups in total and by sex are presented in Table 2. As  
4  
5 shown in Table 2, the low numbers of events prevented sex-specific analyses.  
6  
7

8 Associations between physical heaviness of work and primary health care visits  
9  
10 due to the three outcome groups are presented in Table 3. Overall, the age- and sex-adjusted  
11  
12 estimates (Model 1) were slightly attenuated after including parental occupational status  
13  
14 smoking, BMI and physical activity (Model 2). We observed an association between early  
15  
16 exposure only and any musculoskeletal disorders (fully adjusted RR 1.55, 95% CI 1.05–2.28)  
17  
18 and a slightly weaker association for later exposure only (RR 1.46, 95% 1.01–2.12). Early  
19  
20 and later exposure had the strongest association with any visits due to MSD (RR 1.99, 95%  
21  
22 CI 1.44–2.77).  
23  
24  
25

26 For disorders of the spine, we observed an association for later exposure only  
27  
28 (RR 2.40, 95% CI 1.41–4.06), inconsistent exposure (RR 2.30, 95% CI 1.34–3.95), and early  
29  
30 and later exposure (RR 2.43, 95% CI 1.42–4.14). Effect estimates for visits due to upper  
31  
32 extremity disorders were also positive, that for early and later exposure (HR 3.97, 95% CI  
33  
34 1.86–8.46) reaching statistical significance, although with a wide confidence interval.  
35  
36  
37  
38  
39

## 40 Discussion

41  
42 In this study, reporting both early and later exposure to heavy physical work was associated  
43  
44 with objectively measured MSDs requiring primary health care visit in midlife. In addition,  
45  
46 physical heaviness of work in early adulthood only was associated with an increased risk of  
47  
48 primary health care visit due to any MSD, and exposure in later adulthood only was  
49  
50 associated with any MSD and disorders of the spine. These diagnosis-specific findings are in  
51  
52 line with our prior findings for self-reported low back pain.<sup>8</sup> Although our current analyses  
53  
54 may have lacked power to detect precise associations, particularly for upper extremity  
55  
56 disorders, the findings suggest that physical work exposure is also a predictor of objectively  
57  
58  
59  
60

1  
2  
3 measured MSDs even after considering behavioural factors and parental socioeconomic  
4  
5 position.  
6

7  
8 Longitudinal studies on the associations between physical work exposures and  
9  
10 objectively measured MSDs are scarce. Specifically, we are not aware of studies that would  
11  
12 have collected and used data on work-related physical exposures of participants from early to  
13  
14 later adulthood, and health care visits due to MSDs in midlife. Some evidence exists  
15  
16 regarding physical work exposures and musculoskeletal pain or disorders at an early stage of  
17  
18 the working career. In one cross-sectional study repetitive and asymmetric demands,  
19  
20 including high probability of repetitive tasks, bending or rotation movements and manual  
21  
22 materials handling, was associated with the presence of neck/shoulder pain and severity of  
23  
24 upper- and lower-back pain among 21-year-old employees.<sup>20</sup> Another cross-sectional study  
25  
26 among less than 30-year-old employees reported similar results regarding the association  
27  
28 between physical work exposures (e.g. repetitive flexion or rotation movements of the trunk,  
29  
30 and more than three years in a job including lifting more than 25 kg at least once an hour) and  
31  
32 low back pain.<sup>21</sup> However, in these studies follow-up for mid-life musculoskeletal disorders  
33  
34 was not available. Timing of outcome measurement seems essential as it is likely that there  
35  
36 are differences in associations between physical work and MSD among 20-35, 36-49 and  
37  
38 over 50-year old employees.<sup>22</sup>  
39  
40  
41  
42  
43

44  
45 Several studies have reported associations between physical work exposures  
46  
47 and increased risk of objectively measured disability retirement due to MSD.<sup>5 23-25</sup> However,  
48  
49 only one of these studies examined how exposure in early adulthood was associated with  
50  
51 disability retirement due to MSD in mid-life.<sup>25</sup> Moreover, only a few studies have reported  
52  
53 associations between cumulative exposure to physical work throughout the work career and  
54  
55 objectively measured sickness absence or disability retirement in general,<sup>26</sup> or due to  
56  
57 disability retirement due to MSD in particular.<sup>6</sup> These findings have been in line with ours,  
58  
59  
60

1  
2  
3 although the cumulative exposure in the study focusing on MSD was assessed using a job  
4 exposure matrix.  
5  
6

7  
8 Some limitations of this study need to be acknowledged. We used self-reported  
9 assessment of physical heaviness of work that was based on a single question. Consequently,  
10 the specificity of the exposure, e.g. regarding exposure of different parts of the body, is low.  
11  
12 Although such questions have widely been used in epidemiological studies and have  
13 indicated good validity,<sup>27</sup> this may partly explain the non-significant associations between  
14 physical work and upper extremity disorders. We cannot rule out the possibility of changes in  
15 the exposure or outcomes between the survey waves, however, the long follow-up enabled us  
16 to examine the long-term consequences of early and later physical work and midlife  
17 musculoskeletal health problems that were objectively measured. It can be speculated that  
18 primary health care visits with musculoskeletal diagnosis among the middle aged are mostly  
19 a result of pain complaints. Severe pain may interfere with work activities and induce need  
20 for sickness absence, which may be the primary motivation for the visit to a physician. Thus,  
21 the used outcomes may reflect the severity of work disability due to musculoskeletal pain.  
22  
23 The follow-up period for the outcomes was neither very long; however, the major strength of  
24 this work is the prospective study design with three repeated assessments of physical  
25 heaviness of work that were initiated already in early adulthood. Moreover, the used cohort  
26 data were representative of the general population with relatively little loss to follow-up.<sup>13</sup>  
27  
28 This suggests good generalizability to the Finnish working population, while more caution is  
29 needed when assessing generalizability to other countries with different health care systems.  
30  
31  
32  
33  
34  
35  
36  
37  
38  
39  
40  
41  
42  
43  
44  
45  
46  
47  
48  
49  
50

51 In summary, our findings suggest that exposure to heavy physical work over the  
52 work career contributes to the high burden in the health care. Therefore, preventive actions  
53 against musculoskeletal problems due to physically heavy work in early adulthood, later  
54 adulthood and cumulatively throughout the work career are needed. One possible action,  
55  
56  
57  
58  
59  
60

1  
2  
3 specifically among young employees, might be good introduction to ergonomic ways to  
4  
5 work. Guidance on how to recover from physical work tasks is also important; for example,  
6  
7 at individual level recovery training has been seen beneficial to the employees.<sup>28</sup> At  
8  
9 organizational level, procedures enabling recovery during the work day could include task  
10  
11 variation and convenient work-break schedules,<sup>28</sup> which are likely to be applicable  
12  
13 throughout the work career.  
14  
15

### 16 17 18 19 **A competing interest declaration**

20  
21 All authors have completed the Unified Competing Interest form at  
22  
23 [www.icmje.org/coi\\_disclosure.pdf](http://www.icmje.org/coi_disclosure.pdf) (available on request from the corresponding author) and  
24  
25 declare that (1) JIH and TLa have support from the Academy of Finland; (2) JIH and TLa  
26  
27 have no relationships with the Finnish Academy that might have an interest in the submitted  
28  
29 work in the previous 3 years; (3) their spouses, partners, or children have no financial  
30  
31 relationships that may be relevant to the submitted work; and (4) JIH, RS, HS, MM, SS, EV-  
32  
33 J, MK, TLe, OR and TLa have no non-financial interests that may be relevant to the  
34  
35 submitted work.  
36  
37  
38  
39  
40  
41

42  
43 **Authors' contributions** JIH, RS, MM, HS, EV-J, SS and TLa conceived and designed the  
44  
45 experiments, TLa analysed the data, JIH wrote the first draft of the article, MK, TLe and OR  
46  
47 contributed materials and/or analysis tools. TLa, MK, TLe and OR contributed to the funding  
48  
49 of the study. TLa is the guarantor of the study. All authors were involved in interpretation of  
50  
51 the findings, writing the paper and approved the submitted and published versions.  
52  
53  
54  
55

56  
57 **Funding** The research was funded by the Finnish Academy (grant numbers 287488 and  
58  
59 319200 for TLa and JIH). The Young Finns Study has been financially supported by the  
60

1  
2  
3 Academy of Finland: grants 286284, 134309 (Eye), 126925, 121584, 124282, 129364,  
4  
5 129378 (Salve), 117787 (Gendi), and 41071 (Skidi); the Social Insurance Institution of  
6  
7 Finland; Competitive State Research Financing of the Expert Responsibility area of Kuopio,  
8  
9 Tampere and Turku University Hospitals (grant X51001); Juho Vainio Foundation; Paavo  
10  
11 Nurmi Foundation; Finnish Foundation for Cardiovascular Research; Finnish Cultural  
12  
13 Foundation; The Sigrid Juselius Foundation; Tampere Tuberculosis Foundation; Emil  
14  
15 Aaltonen Foundation; Yrjö Jahnsson Foundation; Signe and Ane Gyllenberg Foundation;  
16  
17 Diabetes Research Foundation of Finnish Diabetes Association; and EU Horizon 2020 (grant  
18  
19 755320 for TAXINOMISIS); and European Research Council (grant 742927 for  
20  
21 MULTIEPIGEN project); Tampere University Hospital Supporting Foundation.  
22  
23  
24  
25  
26  
27

28 **Ethics approval** The study has received ethical approval from the Ethics Committee of the  
29  
30 Hospital District of Southwest Finland on September 21st, 2010.  
31  
32  
33  
34

35 **Data sharing** No additional data available  
36  
37  
38  
39

40 **Acknowledgements** The authors thank statistician Niina Kartiosuo for her help with the  
41  
42 formation of the analysis dataset.  
43  
44  
45  
46

## 47 **Figure Legend**

48  
49 **Figure 1.** Study design.  
50  
51  
52  
53  
54  
55  
56  
57  
58  
59  
60



## References

- 1 OECD. *Sickness, Disability and Work: Breaking the Barriers. A Synthesis of Findings across OECD Countries* OECD Publishing, Paris. 2010.
- 2 Linaker C, Harris EC, Cooper C, Coggon D, Palmer KT. The burden of sickness absence from musculoskeletal causes in Great Britain. *Occup Med (Lond)* 2011;61:458-64.
- 3 Statistics Finland. *Recipients of disability pension 2018*.
- 4 Bevan S. Economic impact of musculoskeletal disorders (MSDs) on work in Europe. *Best Pract Res Clin Rheumatol* 2015;29:356-73.
- 5 Foss L, Gravseth HM, Kristensen P et al. The impact of workplace risk factors on long-term musculoskeletal sickness absence: a registry-based 5-year follow-up from the Oslo health study. *J Occup Environ Med* 2011;53:1478-82.
- 6 Ervasti J, Pietilainen O, Rahkonen O et al. Long-term exposure to heavy physical work, disability pension due to musculoskeletal disorders and all-cause mortality: 20-year follow-up-introducing Helsinki Health Study job exposure matrix. *Int Arch Occup Environ Health* 2018.
- 7 Madsen IEH, Gupta N, Budtz-Jorgensen E et al. Physical work demands and psychosocial working conditions as predictors of musculoskeletal pain: a cohort study comparing self-reported and job exposure matrix measurements. *Occup Environ Med* 2018;75:752-758.
- 8 Lallukka T, Viikari-Juntura E, Viikari J et al. Early work-related physical exposures and low back pain in midlife: the Cardiovascular Risk in Young Finns Study. *Occup Environ Med* 2017;74:163-168.
- 9 Kjellberg K, Lundin A, Falkstedt D, Allebeck P, Hemmingsson T. Long-term physical workload in middle age and disability pension in men and women: a follow-up study of Swedish cohorts. *Int Arch Occup Environ Health* 2016;89:1239-1250.
- 10 Sundstrup E, Hansen AM, Mortensen EL et al. Retrospectively assessed physical work environment during working life and risk of sickness absence and labour market exit among older workers. *Occup Environ Med* 2018;75:114-123.
- 11 Lallukka T, Viikari-Juntura E, Raitakari OT et al. Childhood and adult socio-economic position and social mobility as determinants of low back pain outcomes. *Eur J Pain* 2014;18:128-38.
- 12 Power C, Atherton K, Strachan DP et al. Life-course influences on health in British adults: effects of socio-economic position in childhood and adulthood. *Int J Epidemiol* 2007;36:532-9.
- 13 Raitakari OT, Juonala M, Ronnema T et al. Cohort profile: the cardiovascular risk in Young Finns Study. *Int J Epidemiol* 2008;37:1220-6.
- 14 National Institute for Health and Welfare. *Register of Primary Health Care visits, Helsinki: National Institute for Health and Welfare 2019*.
- 15 Rovio SP, Yang X, Kankaanpaa A et al. Longitudinal physical activity trajectories from childhood to adulthood and their determinants: The Young Finns Study. *Scand J Med Sci Sports* 2018;28:1073-1083.
- 16 Telama R, Yang X, Leskinen E et al. Tracking of physical activity from early childhood through youth into adulthood. *Med Sci Sports Exerc* 2014;46:955-62.
- 17 Shiri R, Karppinen J, Leino-Arjas P, Solovieva S, Viikari-Juntura E. The association between smoking and low back pain: a meta-analysis. *Am J Med* 2010;123:87.e7-35.
- 18 -. The association between obesity and low back pain: a meta-analysis. *Am J Epidemiol* 2010;171:135-54.
- 19 Shiri R, Euro U, Heliovaara M et al. Lifestyle Risk Factors Increase the Risk of Hospitalization for Sciatica: Findings of Four Prospective Cohort Studies. *Am J Med* 2017;130:1408-1414.e6.
- 20 Lourenco S, Araujo F, Severo M, Cunha Miranda L, Carnide F, Lucas R. Patterns of biomechanical demands are associated with musculoskeletal pain in the beginning of professional life: a population-based study. *Scand J Work Environ Health* 2015;41:234-46.



- 1  
2  
3 21 Van Nieuwenhuysse A, Fatkhutdinova L, Verbeke G et al. Risk factors for first-ever low back  
4 pain among workers in their first employment. *Occup Med (Lond)* 2004;54:513-9.  
5 22 Oakman J, Neupane S, Nygard CH. Does age matter in predicting musculoskeletal disorder  
6 risk? An analysis of workplace predictors over 4 years. *Int Arch Occup Environ Health*  
7 2016;89:1127-36.  
8 23 Lahelma E, Laaksonen M, Lallukka T et al. Working conditions as risk factors for disability  
9 retirement: a longitudinal register linkage study. *BMC Public Health* 2012;12:309.  
10 24 Robroek SJW, Jarvholm B, van der Beek AJ, Proper KI, Wahlstrom J, Burdorf A. Influence of  
11 obesity and physical workload on disability benefits among construction workers followed  
12 up for 37 years. *Occup Environ Med* 2017;74:621-627.  
13 25 Ropponen A, Svedberg P, Koskenvuo M, Silventoinen K, Kaprio J. Physical work load and  
14 psychological stress of daily activities as predictors of disability pension due to  
15 musculoskeletal disorders. *Scand J Public Health* 2014;42:370-6.  
16 26 Sundstrup E, Hansen AM, Mortensen EL et al. Cumulative occupational mechanical  
17 exposures during working life and risk of sickness absence and disability pension:  
18 prospective cohort study. *Scand J Work Environ Health* 2017;43:415-425.  
19 27 Stock SR, Fernandes R, Delisle A, Vezina N. Reproducibility and validity of workers' self-  
20 reports of physical work demands. *Scand J Work Environ Health* 2005;31:409-37.  
21 28 Verbeek J, Ruotsalainen J, Laitinen J et al. Interventions to enhance recovery in healthy  
22 workers; a scoping review. *Occup Med (Lond)* 2018.  
23  
24  
25  
26  
27  
28  
29  
30  
31  
32  
33  
34  
35  
36  
37  
38  
39  
40  
41  
42  
43  
44  
45  
46  
47  
48  
49  
50  
51  
52  
53  
54  
55  
56  
57  
58  
59  
60

**Table 1.** Descriptive statistics of the study population at baseline, percentages (%).

| Variable (N missing)                           | All                         | Men                         | Women                       |
|------------------------------------------------|-----------------------------|-----------------------------|-----------------------------|
|                                                | N <sub>obs</sub> =5850<br>% | N <sub>obs</sub> =2490<br>% | N <sub>obs</sub> =3360<br>% |
| Parental occupational status (125)             |                             |                             |                             |
| upper non-manual                               | 14                          | 15                          | 14                          |
| lower non-manual                               | 42                          | 40                          | 44                          |
| upper manual                                   | 27                          | 28                          | 26                          |
| lower manual                                   | 17                          | 17                          | 16                          |
| Ever smokers (-)                               | 46                          | 51                          | 46                          |
| Low physical activity index* (30)              | 67                          | 67                          | 67                          |
| Cumulative exposure to heavy physical work (-) |                             |                             |                             |
| No exposure                                    | 49                          | 37                          | 58                          |
| Early exposure only                            | 12                          | 16                          | 8                           |
| Later exposure only                            | 13                          | 10                          | 15                          |
| Inconsistent exposure                          | 11                          | 11                          | 11                          |
| Early and later exposure                       | 15                          | 26                          | 8                           |
| Outcomes (-)                                   |                             |                             |                             |
| Any musculoskeletal disease                    | 21                          | 17                          | 24                          |
| Disorders of the spine                         | 10                          | 8                           | 11                          |
| Upper extremity disorders                      | 5                           | 4                           | 6                           |
| Osteoarthritis                                 | 1.4                         | 0.8                         | 1.8                         |

\* Index score 5-10

**Table 2.** Number of observations and proportions (%) of primary health care visits due to musculoskeletal diseases by the exposure categories for physical heaviness of work between 2011 and 2014.

| Physical heaviness of work | Any musculoskeletal disease<br>N <sub>obs</sub> (%) | Disorders of the spine<br>N <sub>obs</sub> (%) | Upper extremity disorders<br>N <sub>obs</sub> (%) | Osteoarthritis<br>N <sub>obs</sub> (%) |
|----------------------------|-----------------------------------------------------|------------------------------------------------|---------------------------------------------------|----------------------------------------|
| All                        | 1120                                                | 540                                            | 265                                               | 80                                     |
| No exposure                | 420 (37)                                            | 175 (32)                                       | 70 (26)                                           | 45 (0.8)                               |
| Early exposure             | 140 (12)                                            | 65 (12)                                        | 35 (13)                                           | 20 (0.4)                               |
| Later exposure             | 165 (15)                                            | 105 (19)                                       | 45 (17)                                           | 5 (0.1)                                |
| Inconsistent exposure      | 175 (16)                                            | 85 (16)                                        | 35 (13)                                           | 10 (0.2)                               |
| Early and later exposure   | 220 (20)                                            | 110 (20)                                       | 80 (30)                                           | 0 (0)                                  |
| Men                        | 745                                                 | 360                                            | 170                                               | 60                                     |
| No exposure                | 340 (46)                                            | 105 (42)                                       | 50 (29)                                           | 35 (58)                                |
| Early exposure             | 60 (8)                                              | 30 (8)                                         | 15 (9)                                            | 15 (25)                                |
| Later exposure             | 110 (15)                                            | 65 (18)                                        | 30 (18)                                           | 5 (8)                                  |
| Inconsistent exposure      | 130 (18)                                            | 55 (15)                                        | 35 (21)                                           | 5 (8)                                  |
| Early and later exposure   | 105 (14)                                            | 60 (17)                                        | 40 (23)                                           | 0 (0)                                  |
| Women                      | 375                                                 | 180                                            | 95                                                | 20                                     |
| No exposure                | 80 (21)                                             | 25 (14)                                        | 20 (21)                                           | 10 (50)                                |
| Early exposure             | 80 (21)                                             | 35 (19)                                        | 20 (21)                                           | 5 (25)                                 |
| Later exposure             | 55 (15)                                             | 40 (22)                                        | 15 (16)                                           | 0 (0)                                  |
| Inconsistent exposure      | 45 (12)                                             | 30 (17)                                        | 0 (0)                                             | 5 (25)                                 |
| Early and later exposure   | 115 (31)                                            | 50 (28)                                        | 40 (42)                                           | 0 (0)                                  |

**Table 3.** Risk ratios for primary health care visits due to musculoskeletal diseases in relation to early and later exposure to heavy physical work.

| Physical heaviness of work         | Model 1* |        |      | Model 2† |        |      |
|------------------------------------|----------|--------|------|----------|--------|------|
|                                    | RR       | 95% CI |      | RR       | 95% CI |      |
| <i>Any musculoskeletal disease</i> |          |        |      |          |        |      |
| No exposure                        | 1        |        |      | 1        |        |      |
| Early exposure                     | 1.65     | 1.12   | 2.41 | 1.55     | 1.05   | 2.28 |
| Later exposure                     | 1.55     | 1.08   | 2.22 | 1.46     | 1.01   | 2.12 |
| Inconsistent exposure              | 1.94     | 1.39   | 2.72 | 1.87     | 1.34   | 2.61 |
| Early and later exposure           | 2.12     | 1.53   | 2.93 | 1.99     | 1.44   | 2.77 |
| <i>Disorders of the spine</i>      |          |        |      |          |        |      |
| No exposure                        | 1        |        |      | 1        |        |      |
| Early exposure                     | 1.88     | 1.03   | 3.43 | 1.76     | 0.96   | 3.22 |
| Later exposure                     | 2.48     | 1.49   | 4.14 | 2.40     | 1.41   | 4.06 |
| Inconsistent exposure              | 2.31     | 1.34   | 3.98 | 2.30     | 1.34   | 3.95 |
| Early and later exposure           | 2.61     | 1.55   | 4.39 | 2.43     | 1.42   | 4.14 |
| <i>Upper extremity disorders</i>   |          |        |      |          |        |      |
| No exposure                        | 1        |        |      | 1        |        |      |
| Early exposure                     | 2.51     | 1.03   | 6.12 | 2.16     | 0.87   | 5.37 |
| Later exposure                     | 2.30     | 0.99   | 5.38 | 2.02     | 0.85   | 4.85 |
| Inconsistent exposure              | 2.32     | 0.96   | 5.65 | 2.26     | 0.94   | 5.43 |
| Early and later exposure           | 4.77     | 2.26   | 10.1 | 3.97     | 1.86   | 8.46 |

\* Model 1 adjusted for age and sex

† Model 2 adjusted for age, sex, smoking, BMI, physical activity and parental occupational class

1  
2  
3  
4  
5  
6  
7  
8  
9  
10  
11  
12  
13  
14  
15  
16  
17  
18  
19  
20  
21  
22  
23  
24  
25  
26  
27  
28  
29  
30  
31  
32  
33  
34  
35  
36  
37  
38  
39  
40  
41  
42  
43  
44  
45  
46  
47  
48  
49  
50  
51  
52  
53  
54  
55  
56  
57  
58  
59  
60

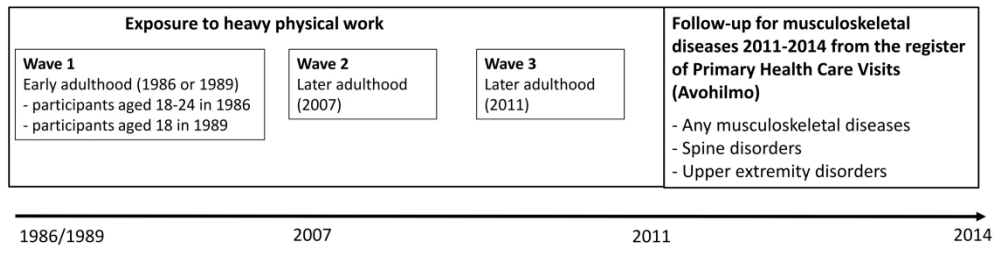

289x80mm (300 x 300 DPI)

1 STROBE Statement— Halonen JI et al. Exposure to heavy physical work from early to later  
 2  
 3 adulthood and primary health care visits due to musculoskeletal diseases in midlife: a register linked  
 4  
 5 study  
 6  
 7

|                              | Item No | Recommendation                                                                                                                                                                                                                                                                                                                                                                                                                |
|------------------------------|---------|-------------------------------------------------------------------------------------------------------------------------------------------------------------------------------------------------------------------------------------------------------------------------------------------------------------------------------------------------------------------------------------------------------------------------------|
| <b>Title and abstract</b>    | 1       | (a) Indicate the study's design with a commonly used term in the title or the abstract <b>SEE Abstract on p. 3</b><br>(b) Provide in the abstract an informative and balanced summary of what was done and what was found <b>SEE p. 3</b>                                                                                                                                                                                     |
| <b>Introduction</b>          |         |                                                                                                                                                                                                                                                                                                                                                                                                                               |
| Background/rationale         | 2       | Explain the scientific background and rationale for the investigation being reported <b>SEE p. 4</b>                                                                                                                                                                                                                                                                                                                          |
| Objectives                   | 3       | State specific objectives, including any pre-specified hypotheses <b>SEE p. 5</b>                                                                                                                                                                                                                                                                                                                                             |
| <b>Methods</b>               |         |                                                                                                                                                                                                                                                                                                                                                                                                                               |
| Study design                 | 4       | Present key elements of study design early in the paper <b>SEE p. 5</b>                                                                                                                                                                                                                                                                                                                                                       |
| Setting                      | 5       | Describe the setting, locations, and relevant dates, including periods of recruitment, exposure, follow-up, and data collection <b>SEE pp. 5-8</b>                                                                                                                                                                                                                                                                            |
| Participants                 | 6       | (a) Give the eligibility criteria, and the sources and methods of selection of participants. Describe methods of follow-up <b>SEE pp. 5-7</b><br>(b) For matched studies, give matching criteria and number of exposed and unexposed <b>NA</b>                                                                                                                                                                                |
| Variables                    | 7       | Clearly define all outcomes, exposures, predictors, potential confounders, and effect modifiers. Give diagnostic criteria, if applicable <b>SEE pp. 6-8</b>                                                                                                                                                                                                                                                                   |
| Data sources/<br>measurement | 8*      | For each variable of interest, give sources of data and details of methods of assessment (measurement). Describe comparability of assessment methods if there is more than one group <b>SEE pp. 5-8</b>                                                                                                                                                                                                                       |
| Bias                         | 9       | Describe any efforts to address potential sources of bias <b>SEE p. 8 (covariate adjustments and alternative analysis method)</b>                                                                                                                                                                                                                                                                                             |
| Study size                   | 10      | Explain how the study size was arrived at <b>SEE p. 5</b>                                                                                                                                                                                                                                                                                                                                                                     |
| Quantitative variables       | 11      | Explain how quantitative variables were handled in the analyses. If applicable, describe which groupings were chosen and why <b>SEE pp. 5-8</b>                                                                                                                                                                                                                                                                               |
| Statistical methods          | 12      | (a) Describe all statistical methods, including those used to control for confounding <b>SEE p. 8</b><br>(b) Describe any methods used to examine subgroups and interactions <b>SEE p. 8</b><br>(c) Explain how missing data were addressed <b>Missing data were imputed, see p. 7-8</b><br>(d) If applicable, explain how loss to follow-up was addressed <b>NA</b><br>(e) Describe any sensitivity analyses <b>SEE p. 8</b> |
| <b>Results</b>               |         |                                                                                                                                                                                                                                                                                                                                                                                                                               |
| Participants                 | 13*     | (a) Report numbers of individuals at each stage of study—eg numbers potentially eligible, examined for eligibility, confirmed eligible, included in the study, completing follow-up, and analysed <b>SEE p. 5 and Table 1</b><br>(b) Give reasons for non-participation at each stage <b>NA</b><br>(c) Consider use of a flow diagram <b>No flow diagram, inclusion criteria explained on page 5</b>                          |

|    |                          |     |                                                                                                                                                                                                                                 |
|----|--------------------------|-----|---------------------------------------------------------------------------------------------------------------------------------------------------------------------------------------------------------------------------------|
| 1  | Descriptive data         | 14* | (a) Give characteristics of study participants (eg demographic, clinical, social) and information on exposures and potential confounders <b>SEE pp. 8-9, Table 1</b>                                                            |
| 2  |                          |     | (b) Indicate number of participants with missing data for each variable of interest <b>SEE Table 1.</b>                                                                                                                         |
| 3  |                          |     | (c) Summarise follow-up time (eg, average and total amount) <b>see p. 8</b>                                                                                                                                                     |
| 4  | Outcome data             | 15* | Report numbers of outcome events or summary measures over time <b>SEE Table 2.</b>                                                                                                                                              |
| 5  | Main results             | 16  | (a) Give unadjusted estimates and, if applicable, confounder-adjusted estimates and their precision (eg, 95% confidence interval). Make clear which confounders were adjusted for and why they were included <b>SEE Table 3</b> |
| 6  |                          |     | (b) Report category boundaries when continuous variables were categorized <b>See pp. 5-7</b>                                                                                                                                    |
| 7  |                          |     | (c) If relevant, consider translating estimates of relative risk into absolute risk for a meaningful time period <b>NA</b>                                                                                                      |
| 8  | Other analyses           | 17  | Report other analyses done—eg analyses of subgroups and interactions, and sensitivity analyses <b>SEE p. 8</b>                                                                                                                  |
| 9  | <b>Discussion</b>        |     |                                                                                                                                                                                                                                 |
| 10 | Key results              | 18  | Summarise key results with reference to study objectives <b>SEE p. 9</b>                                                                                                                                                        |
| 11 | Limitations              | 19  | Discuss limitations of the study, taking into account sources of potential bias or imprecision. Discuss both direction and magnitude of any potential bias <b>SEE pp. 10-11</b>                                                 |
| 12 | Interpretation           | 20  | Give a cautious overall interpretation of results considering objectives, limitations, multiplicity of analyses, results from similar studies, and other relevant evidence <b>SEE pp. 9-11</b>                                  |
| 13 | Generalizability         | 21  | Discuss the generalizability (external validity) of the study results <b>SEE p. 11</b>                                                                                                                                          |
| 14 | <b>Other information</b> |     |                                                                                                                                                                                                                                 |
| 15 | Funding                  | 22  | Give the source of funding and the role of the funders for the present study and, if applicable, for the original study on which the present article is based <b>SEE pp. 12-13</b>                                              |

\*Give information separately for exposed and unexposed groups.

**Note:** An Explanation and Elaboration article discusses each checklist item and gives methodological background and published examples of transparent reporting. The STROBE checklist is best used in conjunction with this article (freely available on the Web sites of PLoS Medicine at <http://www.plosmedicine.org/>, Annals of Internal Medicine at <http://www.annals.org/>, and Epidemiology at <http://www.epidem.com/>). Information on the STROBE Initiative is available at <http://www.strobe-statement.org>.

# BMJ Open

## Exposure to heavy physical work from early to later adulthood and primary health care visits due to musculoskeletal diseases in midlife: a register linked study

|                                 |                                                                                                                                                                                                                                                                                                                                                                                                                                                                                                                                                                                                                                                                                                                                                                                                                                                                                                                                                                                                                             |
|---------------------------------|-----------------------------------------------------------------------------------------------------------------------------------------------------------------------------------------------------------------------------------------------------------------------------------------------------------------------------------------------------------------------------------------------------------------------------------------------------------------------------------------------------------------------------------------------------------------------------------------------------------------------------------------------------------------------------------------------------------------------------------------------------------------------------------------------------------------------------------------------------------------------------------------------------------------------------------------------------------------------------------------------------------------------------|
| Journal:                        | <i>BMJ Open</i>                                                                                                                                                                                                                                                                                                                                                                                                                                                                                                                                                                                                                                                                                                                                                                                                                                                                                                                                                                                                             |
| Manuscript ID                   | bmjopen-2019-031564.R1                                                                                                                                                                                                                                                                                                                                                                                                                                                                                                                                                                                                                                                                                                                                                                                                                                                                                                                                                                                                      |
| Article Type:                   | Research                                                                                                                                                                                                                                                                                                                                                                                                                                                                                                                                                                                                                                                                                                                                                                                                                                                                                                                                                                                                                    |
| Date Submitted by the Author:   | 04-Jul-2019                                                                                                                                                                                                                                                                                                                                                                                                                                                                                                                                                                                                                                                                                                                                                                                                                                                                                                                                                                                                                 |
| Complete List of Authors:       | Halonen, Jaana; Finnish Institute of Occupational Health<br>Shiri, Rahman; Finnish Institute of Occupational Health, Centre of Expertise for Health and Work Ability<br>Mänty, Minna; University of Helsinki, Department of Public Health<br>Sumanen, Hilla; South-Eastern Finland University of Applied Sciences, Health care and emergency care; University of Helsinki, Public Health<br>Solovieva, Svetlana; Finnish Institute of Occupational Health, Center of Expertise for Health and workability<br>Viikari-Juntura, Eira; Finnish Institute of Occupational Health,<br>Kahonen, Mika; University of Tampere , Department of Clinical Physiology; Tampere University Hospital<br>Lehtimäki, Terho<br>Raitakari, Olli; University of Turku, Research Centre of Applied and Preventive Cardiovascular Medicine; Turku University Hospital, Department of Clinical Physiology and Nuclear Medicine<br>Lallukka, Tea; Työterveyslaitos ; Helsingin Yliopisto Laaketieteellinen tiedekunta, Department of Public Health |
| <b>Primary Subject Heading</b>: | Occupational and environmental medicine                                                                                                                                                                                                                                                                                                                                                                                                                                                                                                                                                                                                                                                                                                                                                                                                                                                                                                                                                                                     |
| Secondary Subject Heading:      | Epidemiology                                                                                                                                                                                                                                                                                                                                                                                                                                                                                                                                                                                                                                                                                                                                                                                                                                                                                                                                                                                                                |
| Keywords:                       | Musculoskeletal disorders < ORTHOPAEDIC & TRAUMA SURGERY, Physical work, Spine < ORTHOPAEDIC & TRAUMA SURGERY, Upper extremity, OCCUPATIONAL & INDUSTRIAL MEDICINE                                                                                                                                                                                                                                                                                                                                                                                                                                                                                                                                                                                                                                                                                                                                                                                                                                                          |
|                                 |                                                                                                                                                                                                                                                                                                                                                                                                                                                                                                                                                                                                                                                                                                                                                                                                                                                                                                                                                                                                                             |

SCHOLARONE™  
Manuscripts



1  
2  
3 *Research article: BMJ Open*  
4

5 Exposure to heavy physical work from early to later adulthood and primary  
6 health care visits due to musculoskeletal diseases in midlife: a register linked  
7  
8 study  
9  
10  
11  
12

13 Jaana I. Halonen,<sup>1</sup> Rahman Shiri,<sup>1</sup> Minna Mänty,<sup>2,3</sup> Hilla Sumanen,<sup>3,4</sup> Svetlana Solovieva,<sup>1</sup>

14 Eira Viikari-Juntura,<sup>1</sup> Mika Kähönen,<sup>5</sup> Terho Lehtimäki,<sup>6</sup> Olli T. Raitakari,<sup>7,8,9</sup> Tea

15 Lallukka<sup>1,3</sup>  
16  
17  
18

19  
20 1 Finnish Institute of Occupational Health, Helsinki, Finland  
21

22 2 City of Vantaa, Finland  
23

24 3 Department of Public Health, University of Helsinki, Helsinki, Finland  
25

26 4 South-Eastern Finland University of Applied Sciences, Kotka, Finland  
27

28 5 Department of Clinical Physiology, Tampere University Hospital, and Finnish  
29 Cardiovascular Research Center - Tampere, Faculty of Medicine and Health Technology,  
30 Tampere University, Tampere 33521, Finland  
31

32 6 Department of Clinical Chemistry, Fimlab Laboratories, and Finnish Cardiovascular  
33 Research Center - Tampere, Faculty of Medicine and Health Technology, Tampere  
34 University, Tampere 33520, Finland  
35

36 7 Centre for Population Health Research, University of Turku and Turku University Hospital,  
37 Turku, Finland.  
38

39 8 Research Centre of Applied and Preventive Cardiovascular Medicine, University of Turku,  
40 Turku, Finland.  
41

42 9 Department of Clinical Physiology and Nuclear Medicine, Turku University Hospital,  
43 Turku, Finland.  
44

45  
46  
47  
48  
49  
50 Corresponding author: Jaana I. Halonen, address: Finnish Institute of Occupational Health,  
51 70032 TYÖTERVEYSLAITOS, Finland  
52

53 E-mail: [jaana.halonen@ttl.fi](mailto:jaana.halonen@ttl.fi) Telephone: +358 43 82 44 264  
54

55  
56  
57 **Running title** Physical work from early to later adulthood and musculoskeletal visits  
58

59 **Word count** 2784  
60

## Abstract (280/300)

**Objectives:** To examine whether exposure to heavy physical work from early to later adulthood is associated with primary health care visits due to cause-specific musculoskeletal diseases in midlife.

**Design:** Prospective cohort study

**Setting:** Nationally representative Young Finns Study cohort, Finland.

**Participants:** 1056 participants of the Young Finns Study cohort.

**Exposure measure:** Physical work exposure was surveyed in early (18–24 years old, 1986 or 1989) and later adulthood (2007 and 2011), and it was categorized as: “no exposure”, “early exposure only”, “later exposure only”, and “early and later exposure”.

**Primary and secondary outcome measures:** Visits due to any musculoskeletal disease and separately due to spine disorders, and upper extremity disorders were followed-up from national primary health care register from the date of the third survey in 2011 until 2014.

**Results:** Prevalence of any musculoskeletal disease during the follow-up was 20%, that for spine disorders 10%, and that for upper extremity disorders 5%. Those with physically heavy work in early adulthood only had an increased risk of any musculoskeletal disease (risk ratio (RR) 1.55, 95% confidence interval (CI) 1.05–2.28) after adjustment for age, sex, smoking, body mass index, physical activity, and parental occupational class. Later exposure only was associated with visits due to any musculoskeletal disease (RR 1.46, 95% CI 1.01–2.12) and spine disorders (RR 2.40, 95% CI 1.41–4.06). Early and later exposure was associated with all three outcomes: RRs 1.99 (95% CI 1.44–2.77) for any musculoskeletal disease, 2.43 (95% CI 1.42–4.14) for spine disorders, and 3.97 (95% CI 1.86–8.46) for upper extremity disorders.

1  
2  
3 **Conclusions:** To reduce burden of musculoskeletal diseases, preventive actions to reduce  
4 exposure to or mitigate the consequences of physically heavy work throughout the work  
5 career are needed.  
6  
7

8  
9  
10 **Key words:** musculoskeletal; physical work; spine disorder; upper extremity  
11  
12

### 13 14 15 **Strengths and limitations of this study**

- 16  
17 • We used self-reported assessment of physical heaviness of work that was based on a  
18 single question, which is why the specificity of the exposure, e.g. regarding exposure  
19 of different parts of the body, is low.  
20  
21
- 22  
23 • We cannot rule out the possibility of changes in the exposure or outcomes between  
24 the survey waves.  
25  
26
- 27  
28 • The setting enabled us to prospectively examine the long-term consequences of  
29 exposure to early and later physical work and midlife musculoskeletal health  
30 problems that were objectively measured.  
31  
32
- 33  
34 • The used cohort data were representative of the general population with relatively  
35 little loss to follow-up.  
36  
37  
38  
39  
40  
41  
42  
43  
44  
45  
46  
47  
48  
49  
50  
51  
52  
53  
54  
55  
56  
57  
58  
59  
60

## Introduction

Musculoskeletal diseases (MSD) are, along with mental disorders, the leading cause of work disability<sup>1</sup> measured as sickness absence<sup>2</sup> and disability retirements.<sup>3</sup> In the European Union, the estimated total cost of lost productivity attributable to MSD among working-aged people can be up to 2% of gross domestic product (GDP).<sup>4</sup> Contextual factors, particularly those related to workplace, have been identified as risk factors for sickness absence and disability retirement due to musculoskeletal problems<sup>5,6</sup> as well as for musculoskeletal pain.<sup>7</sup> We have reported findings where early and cumulative exposure to physical work were associated with low back pain at midlife.<sup>8</sup> However, pain as an outcome is always self-reported, as well as a common condition. Thus, objective outcome measures are needed to confirm whether the effects of early and cumulative physical work are similar for more severe and objectively assessed MSD outcomes.

Only few studies to date have been able to assess the associations between cumulative exposure to physical work and MSD. A recent study used a job exposure matrix to assess exposure at the level of occupational title and disability retirement due to MSD,<sup>6</sup> but even the first exposure measurements were mainly from midlife. In another study, two individual-level measurements were used to examine the associations between long-term exposure to high physical workload in midlife and risk of disability retirement due to MSD after age of 61,<sup>9</sup> while younger employees were not included. Yet another study used individual-level physical work exposure data that were retrospectively assessed, and observed that cumulative exposure may increase the risk of sickness absence and disability retirement, but results for cause-specific outcomes were not reported.<sup>10</sup> In addition to the lack of cumulative exposure data, prior studies have rarely accounted for family background although parental socioeconomic position has been linked, for example, to later

1  
2  
3 musculoskeletal problems<sup>11</sup> and widespread pain<sup>12</sup> as well as career possibilities<sup>13</sup> and  
4  
5 choices.<sup>14</sup>  
6

7  
8 To fill these gaps in evidence, we examined whether physical heaviness of work  
9  
10 from early adulthood to later adulthood is associated with primary health care visits due to  
11  
12 MSD in midlife. We hypothesized that early, later and repeated exposure to heavy work is  
13  
14 associated with later health care visits. Any MSD was examined as one outcome group, but  
15  
16 we also included two cause-specific groups: disorders of the spine and upper extremities. The  
17  
18 contribution of behavioural factors and parental socioeconomic position in these associations  
19  
20 were considered.  
21  
22  
23  
24  
25

## 26 **Methods**

### 27 **Participants**

28  
29 Data for this study are derived from the Young Finns Study.<sup>15</sup> Cohort baseline data were  
30  
31 collected in 1980 in six age strata: 3, 6, 9, 12, 15, and 18 years resulting in 3596 participants  
32  
33 (response rate 83%). For this study, we included all those who were 18, 21 or 24 years when  
34  
35 responding to the survey in 1986 (early adulthood). These data were completed by including  
36  
37 also those who turned 18 years and responded to the survey in 1989 (**Figure 1**). The age-  
38  
39 based selection criterion was applied as the focus of this study was on early work-related  
40  
41 exposures. Further inclusion criterion required that the participants responded to the question  
42  
43 on physical heaviness of work in 1986 or 1989 (early adulthood exposure, N=1119), and in  
44  
45 2007 (later adulthood exposure, N=1090) and/or in 2011 (later adulthood exposure, N=1042),  
46  
47 which resulted in a total of 10854 participants. After excluding those with missing data on  
48  
49 any covariate (after re-coding and imputation), the final study sample was 1056 cohort  
50  
51 participants (with 5171 observations) who all had work exposure measurement from early  
52  
53  
54  
55  
56  
57  
58  
59  
60

1  
2  
3 adulthood and at least one measurement from later adulthood. The study has been ethically  
4  
5 approved by the Ethics Committee of the Hospital District of Southwest Finland.  
6  
7  
8  
9

#### 10 Patient and Public Involvement statement

11  
12 Patients or the public were not involved in the development of the research question or the  
13  
14 design of this study nor in the conduct of the study.  
15  
16  
17

#### 18 Exposure

19  
20 Physical heaviness of work was enquired at waves 1 to 3 with a single question: “How heavy  
21  
22 is your work physically?”. There were six response alternatives: 1) light sedentary work, 2)  
23  
24 other sedentary work, 3) physically light work, involving standing and moving, 4) medium  
25  
26 heavy work involving moving, 5) physically heavy work, and 6) physically very heavy work.  
27  
28 The responses were categorized as: sedentary/physically light work, and medium to heavy  
29  
30 physical work. We used responses from all three waves to form a five-class exposure variable  
31  
32 categorized as: “no exposure”, when reporting sedentary/physically light work in all three  
33  
34 waves, “early exposure only”, when reporting medium to heavy physical work only in wave  
35  
36 1, “later exposure only”, when reporting medium to heavy physical work in waves 2 or 3  
37  
38 (89% responded to both waves 2 and 3), and “early and later exposure” when reporting  
39  
40 medium to heavy physical work in wave 1 and in later adulthood in wave 2 and/or 3. All  
41  
42 other possible response combinations formed a group “inconsistent exposure”.  
43  
44  
45  
46  
47  
48  
49  
50

#### 51 Outcomes

52  
53 We examined primary health care visits due to a musculoskeletal diagnosis. The follow-up  
54  
55 started from the day after returning wave 3 survey in 2011. Repeated visits were used for the  
56  
57 main analyses. For an alternative analysis, time to the first visit was used as an outcome, and  
58  
59  
60

1  
2  
3 the follow-up from returning the survey in 2011 continued until the first primary health care  
4 visit, death (from Statistics Finland) or end of the follow-up (end of 2014), whichever  
5 occurred first. Data were obtained from the register of primary health care visits (Avohilmo)  
6 maintained by National Institute for Health and Welfare.<sup>16</sup> Diagnosis-specific data have been  
7 collected and were available from 2011 onwards. Visits due to *any musculoskeletal diagnosis*  
8 by International Classification of Diseases (ICD) version 10 codes M00-M99 were examined  
9 over the follow-up period. Additionally, two cause-specific outcome groups with the largest  
10 numbers of events were: 1) disorders of the spine and 2) upper extremity disorders. *Disorders*  
11 *of the spine* included any of the following diseases, surgeries or treatments (ICD-10 code):  
12 cervical disc disorders (M50), lumbar and other intervertebral disc disorders with  
13 radiculopathy (M51.1), other specified intervertebral disc displacement (M51.2), disc  
14 degeneration (M51.3), disc disorders (M51.8), intervertebral disc disorder, unspecified  
15 (M51.9), disc disorder/ disc disease (back disorders with radiation: M50, M51), other  
16 dorsopathies (M53), back pain / dorsalgia (back disorders without radiation: M54.1, M54.2,  
17 M54.3, M54.4, M54.5, M54.6, M54.8, M54.9), and lumbar disc herniation or sciatica  
18 (M51.1, M51.2, M54.3, and M54.4). *Upper extremity disorders* included any of the following  
19 diseases, surgeries or treatments: carpal tunnel syndrome, carpal tunnel release (G56.0,  
20 ACC51, ACC59), shoulder disorder (M75), medial epicondylitis, lateral epicondylitis, and  
21 periarthritis of wrist (M77.0, M77.1, M77.2, or M77.3). Additionally, the numbers of visits  
22 due to osteoarthritis (M15, M16, M17, M18) were examined, but found to be too low for  
23 statistical analyses (see Table 1).

## 53 Covariates

54 From the questionnaires we obtained information on possible confounders. We included sex  
55 and age at wave 1, and parental occupational status in childhood (1=upper non-manual,  
56  
57  
58  
59  
60

1  
2  
3 2=lower non-manual, 3=upper manual, 4=lower manual). Smoking (ever smoker vs. non-  
4  
5 smoker) and body mass index (BMI, kg/m<sup>2</sup> based on measured weight and height) were  
6  
7 included as time varying covariates collected at baseline, 2001, 2007 and 2011. Measure for  
8  
9 leisure-time physical activity (PA) was based on a set of questions requesting the frequency  
10  
11 and intensity of PA, frequency of vigorous PA, hours spent on vigorous PA, average duration  
12  
13 of a PA session, and participation in organized PA. Based on these questions a *physical*  
14  
15 *activity index* was calculated (range 5-15, larger value indicating greater activity).<sup>17</sup> For PA,  
16  
17 we used the maximum of the three measurements of the PA index in adulthood (2001, 2007  
18  
19 and 2011), as these data had plenty of missing values (N missing =730 in 2001, 150 in 2007  
20  
21 and 475 in 2011), but the patterns of PA have been observed to remain constant in  
22  
23 adulthood.<sup>18</sup> Missing data on smoking were re-coded as “non-smoker”, and missing data on  
24  
25 BMI were imputed using mean of the study sample in the corresponding survey. Although  
26  
27 this is not the strongest imputation method we considered it was the most applicable one, as  
28  
29 the method only concerned one covariate. All these covariates have been linked to back  
30  
31 problems in prior studies<sup>11 19-21</sup> and smoking can be also considered as an indicator of low  
32  
33 socioeconomic position, which may affect the choice of employment and further physical  
34  
35 workload.  
36  
37  
38  
39  
40  
41  
42  
43  
44  
45

#### 46 Statistical analyses

47 We used generalized estimating equation (GEE) models with Poisson distribution to assess  
48  
49 associations between the five-class physical work exposure, “no exposure” serving as the  
50  
51 reference group, and repeated primary health care visits due to MSD. This method was  
52  
53 chosen as the GEE models permit specification of a working correlation matrix that accounts  
54  
55 for the form of within-subject correlation of responses on dependent variables of many  
56  
57 different distributions, including Poisson.<sup>22</sup> We ran models separately for all musculoskeletal  
58  
59  
60



1  
2  
3 visits, for disorders of the spine, and for upper extremity disorders. Two model specifications  
4  
5 were used: Model 1 was adjusted for sex and age at baseline, Model 2 was additionally  
6  
7 adjusted for parental occupational class, physical activity, and time-varying smoking and  
8  
9 BMI. Results are presented as risk ratios (RR) with 95% confidence intervals (CI). As an  
10  
11 alternative method, we ran the analyses using Cox proportional hazard models using time to  
12  
13 the first visit as the outcome, which resulted in very similar findings (supplemental Table 1).  
14  
15  
16  
17  
18

## 19 **Results**

20  
21 Descriptive statistics of the analysis sample in total and by sex are shown in Table 1. At  
22  
23 baseline, mean age was 20.5 (SD=2.9) years, and mean BMI 22.4 (SD=2.3), while the mean  
24  
25 BMI during the follow-up was 25.5 (SD=4.8). Mean follow-up time for first visits due to any  
26  
27 MSD was 3.2 (SD=0.87) years, due to spine disorders 3.4 (SD=0.63) years, and due to upper  
28  
29 extremity disorders 3.4 (SD=0.50) years. In the total sample, prevalence of any  
30  
31 musculoskeletal disease during the follow-up was 20%, that for spine disorders 10%, and that  
32  
33 for upper extremity disorders 5%. Distributions of the outcomes and proportions of events in  
34  
35 each of the five exposure groups in total and by sex are presented in Table 2. As shown in  
36  
37 Table 2, the low numbers of events prevented sex-specific analyses.  
38  
39  
40  
41

42 Associations between physical heaviness of work and primary health care visits  
43  
44 due to the three outcome groups are presented in Table 3. Overall, the age- and sex-adjusted  
45  
46 estimates (Model 1) were slightly attenuated after including parental occupational status  
47  
48 smoking, BMI and physical activity (Model 2). We observed an association between early  
49  
50 exposure only and any musculoskeletal disorders (fully adjusted RR 1.55, 95% CI 1.05–2.28)  
51  
52 and a slightly weaker association for later exposure only (RR 1.46, 95% 1.01–2.12). Early  
53  
54 and later exposure had the strongest association with any visits due to MSD (RR 1.99, 95%  
55  
56 CI 1.44–2.77).  
57  
58  
59  
60

1  
2  
3 For disorders of the spine, we observed an association for later exposure only  
4 (RR 2.40, 95% CI 1.41–4.06), inconsistent exposure (RR 2.30, 95% CI 1.34–3.95), and early  
5 and later exposure (RR 2.43, 95% CI 1.42–4.14). Effect estimates for visits due to upper  
6 and later exposure (RR 2.43, 95% CI 1.42–4.14). Effect estimates for visits due to upper  
7 extremity disorders were also positive, that for early and later exposure (HR 3.97, 95% CI  
8 1.86–8.46) reaching statistical significance, although with a wide confidence interval.  
9  
10  
11  
12  
13  
14  
15  
16

## 17 Discussion

18  
19 In this study, reporting both early and later exposure to heavy physical work was associated  
20 with objectively measured MSDs requiring primary health care visit in midlife. In addition,  
21 physical heaviness of work in early adulthood only was associated with an increased risk of  
22 primary health care visit due to any MSD, and exposure in later adulthood only was  
23 associated with any MSD and disorders of the spine. These diagnosis-specific findings are in  
24 line with our prior findings for self-reported low back pain.<sup>8</sup> Although our current analyses  
25 may have lacked power to detect precise associations, particularly for upper extremity  
26 disorders, the findings suggest that physical work exposure is also a predictor of objectively  
27 measured MSDs even after considering behavioural factors and parental socioeconomic  
28 position.  
29  
30  
31  
32  
33  
34  
35  
36  
37  
38  
39  
40  
41

42 Longitudinal studies on the associations between physical work exposures and  
43 objectively measured MSDs are scarce. Specifically, we are not aware of studies that would  
44 have collected and used data on work-related physical exposures of participants from early to  
45 later adulthood, and health care visits due to MSDs in midlife. Some evidence exists  
46 regarding physical work exposures and musculoskeletal pain or disorders at an early stage of  
47 the working career. In one cross-sectional study repetitive and asymmetric demands,  
48 including high probability of repetitive tasks, bending or rotation movements and manual  
49 materials handling, was associated with the presence of neck/shoulder pain and severity of  
50  
51  
52  
53  
54  
55  
56  
57  
58  
59  
60

1  
2  
3 upper- and lower-back pain among 21-year-old employees.<sup>23</sup> Another cross-sectional study  
4  
5 among less than 30-year-old employees reported similar results regarding the association  
6  
7 between physical work exposures (e.g. repetitive flexion or rotation movements of the trunk,  
8  
9 and more than three years in a job including lifting more than 25 kg at least once an hour) and  
10  
11 low back pain.<sup>24</sup> However, in these studies follow-up for mid-life musculoskeletal disorders  
12  
13 was not available. Timing of outcome measurement seems essential as it is likely that there  
14  
15 are differences in associations between physical work and MSD among 20-35, 36-49 and  
16  
17 over 50-year old employees.<sup>25</sup>

21  
22 Several studies have reported associations between physical work exposures  
23  
24 and increased risk of objectively measured disability retirement due to MSD.<sup>5 26-28</sup> However,  
25  
26 only one of these studies examined how exposure in early adulthood was associated with  
27  
28 disability retirement due to MSD in mid-life.<sup>28</sup> Moreover, only a few studies have reported  
29  
30 associations between cumulative exposure to physical work throughout the work career and  
31  
32 objectively measured sickness absence or disability retirement in general,<sup>29</sup> or due to  
33  
34 disability retirement due to MSD in particular.<sup>6</sup> These findings have been in line with ours,  
35  
36 although the cumulative exposure in the study focusing on MSD was assessed using a job  
37  
38 exposure matrix.  
39  
40

42  
43 Some limitations of this study need to be acknowledged. We used self-reported  
44  
45 assessment of physical heaviness of work that was based on a single question. Consequently,  
46  
47 the specificity of the exposure, e.g. regarding exposure of different parts of the body, is low.  
48  
49 Although such questions have widely been used in epidemiological studies and have  
50  
51 indicated good validity,<sup>30</sup> this may partly explain the non-significant associations between  
52  
53 physical work and upper extremity disorders. We also used a dichotomized physical  
54  
55 heaviness of work measure where medium and heavy/very heavy work were combined as the  
56  
57 proportion of those with heavy/very heavy work was rather low (10% at early adulthood).  
58  
59  
60

1  
2  
3 The used cut-off may have attenuated the observed associations if medium heavy work had  
4 substantially weaker association with health care visits than heavy/very heavy work. We  
5 cannot rule out the possibility of changes in the exposure or outcomes between the survey  
6 waves, which may have caused under- or over-estimation of the associations. However, the  
7 long follow-up enabled us to examine the long-term consequences of early and later physical  
8 work and midlife musculoskeletal health problems that were objectively measured. Some  
9 healthy worker effect may have attenuated the findings as we required minimum of two  
10 responses (from early and later adulthood) regarding physical heaviness of work and those  
11 with physically strenuous work or with musculoskeletal problems may have left employment  
12 before the second survey. It can also be speculated that primary health care visits with  
13 musculoskeletal diagnosis in midlife are mostly a result of pain complaints. Severe pain may  
14 interfere with work activities and induce need for sickness absence, which may be the  
15 primary motivation for the visit to a physician. Thus, the used outcomes may reflect the  
16 severity of work disability due to a subjective measure of musculoskeletal pain. The follow-  
17 up period for the outcomes was not very long and unobserved changes in the exposure or  
18 covariates during the outcome follow-up could have caused some bias to the findings  
19 resulting in under- or overestimation of the observed associations. However, the major  
20 strength of this work is the prospective study design with three repeated assessments of  
21 physical heaviness of work that were initiated in early adulthood. Moreover, the used cohort  
22 data were representative of the general population with relatively little loss to follow-up.<sup>15</sup> As  
23 we used register data, only persons who emigrate will no more have registered health care  
24 visits. This suggests good generalizability to the Finnish working population, while more  
25 caution is needed when assessing generalizability to other countries with different health care  
26 systems.

1  
2  
3 In summary, our findings suggest that exposure to heavy physical work over the  
4 work career contributes to the high burden in the health care. Therefore, preventive actions  
5 against musculoskeletal problems due to physically heavy work in early adulthood, later  
6 adulthood and cumulatively throughout the work career are needed. One possible action,  
7 specifically among young employees, might be good introduction to ergonomic ways to  
8 work. Guidance on how to recover from physical work tasks is also important; for example,  
9 at individual level recovery training has been seen beneficial to the employees.<sup>31</sup> At  
10 organizational level, procedures enabling recovery during the work day could include task  
11 variation and convenient work-break schedules,<sup>31</sup> which are likely to be applicable  
12 throughout the work career.  
13  
14  
15  
16  
17  
18  
19  
20  
21  
22  
23  
24  
25  
26  
27  
28

### 29 **A competing interest declaration**

30 All authors have completed the Unified Competing Interest form at  
31 [www.icmje.org/coi\\_disclosure.pdf](http://www.icmje.org/coi_disclosure.pdf) (available on request from the corresponding author) and  
32 declare that (1) JIH and TLa have support from the Academy of Finland; (2) JIH and TLa  
33 have no relationships with the Finnish Academy that might have an interest in the submitted  
34 work in the previous 3 years; (3) their spouses, partners, or children have no financial  
35 relationships that may be relevant to the submitted work; and (4) JIH, RS, HS, MM, SS, EV-  
36 J, MK, TLe, OR and TLa have no non-financial interests that may be relevant to the  
37 submitted work.  
38  
39  
40  
41  
42  
43  
44  
45  
46  
47  
48  
49  
50

51 **Authors' contributions** JIH, RS, MM, HS, EV-J, SS and TLa conceived and designed the  
52 experiments, TLa analysed the data, JIH wrote the first draft of the article, MK, TLe and OR  
53 contributed materials and/or analysis tools. TLa, MK, TLe and OR contributed to the funding  
54  
55  
56  
57  
58  
59  
60

1  
2  
3 of the study. TLa is the guarantor of the study. All authors were involved in interpretation of  
4  
5 the findings, writing the paper and approved the submitted and published versions.  
6  
7  
8  
9

10 **Funding** The research was funded by the Finnish Academy (grant numbers 287488 and  
11  
12 319200 for TLa and JIH). The Young Finns Study has been financially supported by the  
13  
14 Academy of Finland: grants 286284, 134309 (Eye), 126925, 121584, 124282, 129364,  
15  
16 129378 (Salve), 117787 (Gendi), and 41071 (Skidi); the Social Insurance Institution of  
17  
18 Finland; Competitive State Research Financing of the Expert Responsibility area of Kuopio,  
19  
20 Tampere and Turku University Hospitals (grant X51001); Juho Vainio Foundation; Paavo  
21  
22 Nurmi Foundation; Finnish Foundation for Cardiovascular Research; Finnish Cultural  
23  
24 Foundation; The Sigrid Juselius Foundation; Tampere Tuberculosis Foundation; Emil  
25  
26 Aaltonen Foundation; Yrjö Jahnsson Foundation; Signe and Ane Gyllenberg Foundation;  
27  
28 Diabetes Research Foundation of Finnish Diabetes Association; and EU Horizon 2020 (grant  
29  
30 755320 for TAXINOMISIS); and European Research Council (grant 742927 for  
31  
32 MULTIEPIGEN project); Tampere University Hospital Supporting Foundation.  
33  
34  
35  
36  
37  
38  
39

40 **Ethics approval** The study has received ethical approval from the Ethics Committee of the  
41  
42 Hospital District of Southwest Finland on September 21st, 2010.  
43  
44  
45  
46

47 **Data sharing** TLa had access to an anonymized subset of the data that were used for the  
48  
49 analyses. OTR had full access to all raw data. Raw data from the study are not available due  
50  
51 to confidentiality and sensitivity issues. Subset of raw data can be requested from OTR  
52  
53 olli.raitakari[at]utu.fi.  
54  
55  
56  
57  
58  
59  
60

1  
2  
3 **Acknowledgements** The authors thank statistician Niina Kartiosuo for her help with the  
4  
5 formation of the analysis dataset.  
6  
7  
8  
9

### 10 **Figure Legend**

11  
12 **Figure 1.** Flow chart of the sample selection.  
13  
14  
15  
16  
17  
18  
19  
20  
21  
22  
23  
24  
25  
26  
27  
28  
29  
30  
31  
32  
33  
34  
35  
36  
37  
38  
39  
40  
41  
42  
43  
44  
45  
46  
47  
48  
49  
50  
51  
52  
53  
54  
55  
56  
57  
58  
59  
60

For peer review only

## References

- 1 OECD. *Sickness, Disability and Work: Breaking the Barriers. A Synthesis of Findings across OECD Countries* OECD Publishing, Paris. 2010.
- 2 Linaker C, Harris EC, Cooper C, Coggon D, Palmer KT. The burden of sickness absence from musculoskeletal causes in Great Britain. *Occup Med (Lond)* 2011;61:458-64.
- 3 Statistics Finland. Recipients of disability pension 2018.
- 4 Bevan S. Economic impact of musculoskeletal disorders (MSDs) on work in Europe. *Best Pract Res Clin Rheumatol* 2015;29:356-73.
- 5 Foss L, Gravseth HM, Kristensen P et al. The impact of workplace risk factors on long-term musculoskeletal sickness absence: a registry-based 5-year follow-up from the Oslo health study. *J Occup Environ Med* 2011;53:1478-82.
- 6 Ervasti J, Pietilainen O, Rahkonen O et al. Long-term exposure to heavy physical work, disability pension due to musculoskeletal disorders and all-cause mortality: 20-year follow-up-introducing Helsinki Health Study job exposure matrix. *Int Arch Occup Environ Health* 2018.
- 7 Madsen IEH, Gupta N, Budtz-Jorgensen E et al. Physical work demands and psychosocial working conditions as predictors of musculoskeletal pain: a cohort study comparing self-reported and job exposure matrix measurements. *Occup Environ Med* 2018;75:752-758.
- 8 Lallukka T, Viikari-Juntura E, Viikari J et al. Early work-related physical exposures and low back pain in midlife: the Cardiovascular Risk in Young Finns Study. *Occup Environ Med* 2017;74:163-168.
- 9 Kjellberg K, Lundin A, Falkstedt D, Allebeck P, Hemmingsson T. Long-term physical workload in middle age and disability pension in men and women: a follow-up study of Swedish cohorts. *Int Arch Occup Environ Health* 2016;89:1239-1250.
- 10 Sundstrup E, Hansen AM, Mortensen EL et al. Retrospectively assessed physical work environment during working life and risk of sickness absence and labour market exit among older workers. *Occup Environ Med* 2018;75:114-123.
- 11 Lallukka T, Viikari-Juntura E, Raitakari OT et al. Childhood and adult socio-economic position and social mobility as determinants of low back pain outcomes. *Eur J Pain* 2014;18:128-38.
- 12 Power C, Atherton K, Strachan DP et al. Life-course influences on health in British adults: effects of socio-economic position in childhood and adulthood. *Int J Epidemiol* 2007;36:532-9.
- 13 Laukkonen M-L. Pienituloisten perheiden ylioppilaat välttävät riskiä pääsykokeita painottavissa opiskelijavalinnoissa [High school graduates from low income families evade risk related to student admission emphasizing entrance examinations]: ETLA 2018.
- 14 Whiston SC, Keller BK. The Influences of the Family of Origin on Career Development: A Review and Analysis. *The Counseling Psychologist* 2004;32:493-568.
- 15 Raitakari OT, Juonala M, Rönnemaa T et al. Cohort profile: the cardiovascular risk in Young Finns Study. *Int J Epidemiol* 2008;37:1220-6.
- 16 National Institute for Health and Welfare. Register of Primary Health Care visits, Helsinki: National Institute for Health and Welfare 2019.
- 17 Rovio SP, Yang X, Kankaanpää A et al. Longitudinal physical activity trajectories from childhood to adulthood and their determinants: The Young Finns Study. *Scand J Med Sci Sports* 2018;28:1073-1083.
- 18 Telama R, Yang X, Leskinen E et al. Tracking of physical activity from early childhood through youth into adulthood. *Med Sci Sports Exerc* 2014;46:955-62.
- 19 Shiri R, Karppinen J, Leino-Arjas P, Solovieva S, Viikari-Juntura E. The association between smoking and low back pain: a meta-analysis. *Am J Med* 2010;123:87.e7-35.
- 20 -. The association between obesity and low back pain: a meta-analysis. *Am J Epidemiol* 2010;171:135-54.



- 1  
2  
3 21 Shiri R, Euro U, Heliövaara M et al. Lifestyle Risk Factors Increase the Risk of Hospitalization  
4 for Sciatica: Findings of Four Prospective Cohort Studies. *Am J Med* 2017;130:1408-1414.e6.  
5 22 Ballinger GA. Using Generalized Estimating Equations for Longitudinal Data Analysis.  
6 *Organizational Research Methods* 2004;7:127-150.  
7 23 Lourenco S, Araujo F, Severo M, Cunha Miranda L, Carnide F, Lucas R. Patterns of  
8 biomechanical demands are associated with musculoskeletal pain in the beginning of  
9 professional life: a population-based study. *Scand J Work Environ Health* 2015;41:234-46.  
10 24 Van Nieuwenhuysse A, Fatkhutdinova L, Verbeke G et al. Risk factors for first-ever low back  
11 pain among workers in their first employment. *Occup Med (Lond)* 2004;54:513-9.  
12 25 Oakman J, Neupane S, Nygard CH. Does age matter in predicting musculoskeletal disorder  
13 risk? An analysis of workplace predictors over 4 years. *Int Arch Occup Environ Health*  
14 2016;89:1127-36.  
15 26 Lahelma E, Laaksonen M, Lallukka T et al. Working conditions as risk factors for disability  
16 retirement: a longitudinal register linkage study. *BMC Public Health* 2012;12:309.  
17 27 Robroek SJW, Jarvholm B, van der Beek AJ, Proper KI, Wahlstrom J, Burdorf A. Influence of  
18 obesity and physical workload on disability benefits among construction workers followed  
19 up for 37 years. *Occup Environ Med* 2017;74:621-627.  
20 28 Ropponen A, Svedberg P, Koskenvuo M, Silventoinen K, Kaprio J. Physical work load and  
21 psychological stress of daily activities as predictors of disability pension due to  
22 musculoskeletal disorders. *Scand J Public Health* 2014;42:370-6.  
23 29 Sundstrup E, Hansen AM, Mortensen EL et al. Cumulative occupational mechanical  
24 exposures during working life and risk of sickness absence and disability pension:  
25 prospective cohort study. *Scand J Work Environ Health* 2017;43:415-425.  
26 30 Stock SR, Fernandes R, Delisle A, Vezina N. Reproducibility and validity of workers' self-  
27 reports of physical work demands. *Scand J Work Environ Health* 2005;31:409-37.  
28 31 Verbeek J, Ruotsalainen J, Laitinen J et al. Interventions to enhance recovery in healthy  
29 workers; a scoping review. *Occup Med (Lond)* 2018.  
30  
31  
32  
33  
34  
35  
36  
37  
38  
39  
40  
41  
42  
43  
44  
45  
46  
47  
48  
49  
50  
51  
52  
53  
54  
55  
56  
57  
58  
59  
60

**Table 1.** Descriptive statistics of the study population at baseline.

| Variable                                   | All  |     |
|--------------------------------------------|------|-----|
|                                            | N    | %   |
| Total individuals                          | 1065 | 100 |
| Women                                      | 446  | 42  |
| Men                                        | 610  | 58  |
| Parental occupational status               |      |     |
| upper non-manual                           | 152  | 14  |
| lower non-manual                           | 447  | 42  |
| upper manual                               | 282  | 27  |
| lower manual                               | 175  | 17  |
| Ever smokers                               | 516  | 49  |
| Low physical activity index*               | 710  | 67  |
| Cumulative exposure to heavy physical work |      |     |
| No exposure                                | 523  | 49  |
| Early exposure only                        | 124  | 13  |
| Later exposure only                        | 130  | 12  |
| Inconsistent exposure                      | 118  | 11  |
| Early and later exposure                   | 161  | 15  |
| Outcomes (-)                               |      |     |
| Any musculoskeletal disease                | 221  | 21  |
| Disorders of the spine                     | 107  | 10  |
| Upper extremity disorders                  | 52   | 5   |
| Osteoarthritis                             | 16   | 1.5 |

\* Index score 5-10

**Table 2.** Number of observations and proportions (%) of primary health care visits due to musculoskeletal diseases by the exposure categories for physical heaviness of work between 2011 and 2014.

| Physical heaviness of work | Any musculoskeletal disease<br>N <sub>obs</sub> (%) | Disorders of the spine<br>N <sub>obs</sub> (%) | Upper extremity disorders<br>N <sub>obs</sub> (%) | Osteoarthritis<br>N <sub>obs</sub> (%) |
|----------------------------|-----------------------------------------------------|------------------------------------------------|---------------------------------------------------|----------------------------------------|
| All                        | 1083                                                | 527                                            | 253                                               | 79                                     |
| No exposure                | 405 (37)                                            | 168 (32)                                       | 66 (26)                                           | 44 (56)                                |
| Early exposure             | 137 (13)                                            | 64 (12)                                        | 34 (13)                                           | 20 (25)                                |
| Later exposure             | 156 (14)                                            | 102 (19)                                       | 40 (16)                                           | 5 (6)                                  |
| Inconsistent exposure      | 168 (16)                                            | 85 (16)                                        | 34 (13)                                           | 10 (13)                                |
| Early and later exposure   | 217 (20)                                            | 108 (21)                                       | 79 (31)                                           | 0 (0)                                  |
| Women                      | 730                                                 | 353                                            | 165                                               | 59                                     |
| No exposure                | 334 (46)                                            | 148 (42)                                       | 47 (28)                                           | 35 (58)                                |
| Early exposure             | 58 (8)                                              | 29 (8)                                         | 14 (8)                                            | 15 (25)                                |
| Later exposure             | 107 (15)                                            | 63 (18)                                        | 30 (18)                                           | 5 (8)                                  |
| Inconsistent exposure      | 128 (18)                                            | 55 (16)                                        | 34 (21)                                           | 5 (8)                                  |
| Early and later exposure   | 103 (14)                                            | 58 (16)                                        | 40 (24)                                           | 0 (0)                                  |
| Men                        | 353                                                 | 174                                            | 88                                                | 20                                     |
| No exposure                | 71 (20)                                             | 20 (11)                                        | 19 (22)                                           | 10 (50)                                |
| Early exposure             | 79 (22)                                             | 35 (20)                                        | 20 (23)                                           | 5 (25)                                 |
| Later exposure             | 49 (14)                                             | 39 (23)                                        | 10 (11)                                           | 0 (0)                                  |
| Inconsistent exposure      | 40 (11)                                             | 30 (17)                                        | 0 (0)                                             | 5 (25)                                 |
| Early and later exposure   | 115 (32)                                            | 50 (29)                                        | 39 (44)                                           | 0 (0)                                  |

**Table 3.** Risk ratios for primary health care visits due to musculoskeletal diseases in relation to early and later exposure to heavy physical work.

| Physical heaviness of work         | Model 1* |        |      | Model 2† |        |      |
|------------------------------------|----------|--------|------|----------|--------|------|
|                                    | RR       | 95% CI |      | RR       | 95% CI |      |
| <i>Any musculoskeletal disease</i> |          |        |      |          |        |      |
| No exposure                        | 1        |        |      | 1        |        |      |
| Early exposure                     | 1.65     | 1.12   | 2.41 | 1.55     | 1.05   | 2.28 |
| Later exposure                     | 1.57     | 1.09   | 2.24 | 1.46     | 1.01   | 2.12 |
| Inconsistent exposure              | 1.90     | 1.35   | 2.67 | 1.87     | 1.34   | 2.61 |
| Early and later exposure           | 2.14     | 1.55   | 2.97 | 1.99     | 1.44   | 2.77 |
| <i>Disorders of the spine</i>      |          |        |      |          |        |      |
| No exposure                        | 1        |        |      | 1        |        |      |
| Early exposure                     | 1.87     | 1.02   | 3.42 | 1.76     | 0.96   | 3.22 |
| Later exposure                     | 2.51     | 1.51   | 4.18 | 2.40     | 1.41   | 4.06 |
| Inconsistent exposure              | 2.32     | 1.35   | 3.99 | 2.30     | 1.34   | 3.95 |
| Early and later exposure           | 2.62     | 1.56   | 4.40 | 2.43     | 1.42   | 4.14 |
| <i>Upper extremity disorders</i>   |          |        |      |          |        |      |
| No exposure                        | 1        |        |      | 1        |        |      |
| Early exposure                     | 2.50     | 1.03   | 6.11 | 2.16     | 0.87   | 5.37 |
| Later exposure                     | 2.33     | 1.00   | 5.67 | 2.02     | 0.85   | 4.85 |
| Inconsistent exposure              | 2.33     | 0.96   | 5.67 | 2.26     | 0.94   | 5.43 |
| Early and later exposure           | 4.79     | 2.28   | 10.1 | 3.97     | 1.86   | 8.46 |

\* Model 1 adjusted for age and sex

† Model 2 adjusted for age, sex, smoking, BMI, physical activity and parental occupational class

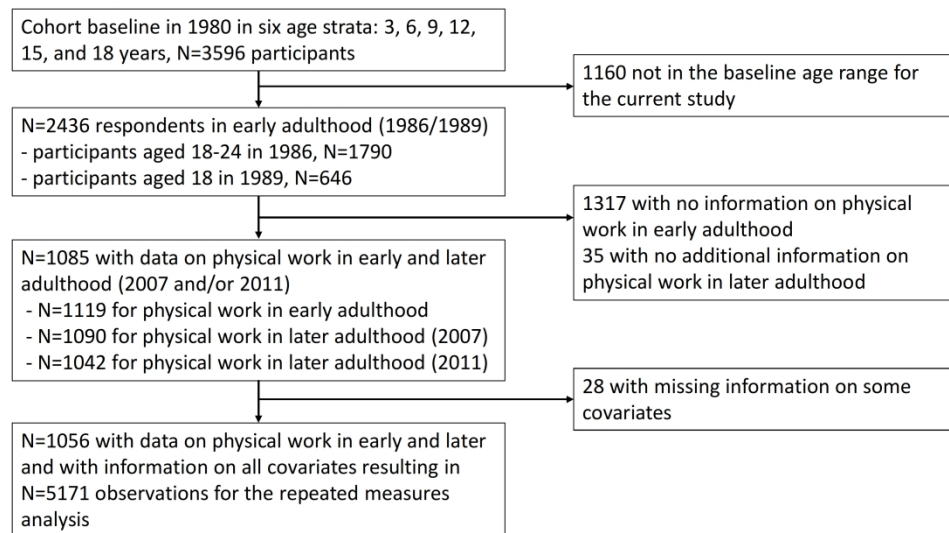

25  
26  
27  
28  
29  
30  
31  
32  
33  
34  
35  
36  
37  
38  
39  
40  
41  
42  
43  
44  
45  
46  
47  
48  
49  
50  
51  
52  
53  
54  
55  
56  
57  
58  
59  
60

Figure 1. Flow chart of the sample selection.

1  
2  
3 **Supplemental material**  
4  
5  
6  
7

8 Exposure to heavy physical work from early to later adulthood and primary  
9  
10 health care visits due to musculoskeletal diseases in midlife: a register linked  
11  
12  
13 study  
14

15  
16 Jaana I. Halonen, Rahman Shiri, Minna Mänty, Hilla Sumanen, Svetlana Solovieva, Eira  
17 Viikari-Juntura, Mika Kähönen, Terho Lehtimäki, Olli T. Raitakari, Tea Lallukka  
18  
19  
20  
21  
22  
23  
24  
25  
26  
27  
28  
29  
30  
31  
32  
33  
34  
35  
36  
37  
38  
39  
40  
41  
42  
43  
44  
45  
46  
47  
48  
49  
50  
51  
52  
53  
54  
55  
56  
57  
58  
59  
60

**Supplemental Table 1.** Associations between early and later exposure to heavy physical work and primary health care visits due to musculoskeletal diseases from Cox proportional hazard models.

| Physical heaviness of work         | Model 1* |        |      | Model 2† |        |      |
|------------------------------------|----------|--------|------|----------|--------|------|
|                                    | HR       | 95% CI |      | HR       | 95% CI |      |
| <i>Any musculoskeletal disease</i> |          |        |      |          |        |      |
| No exposure                        | 1        |        |      | 1        |        |      |
| Early exposure                     | 1.95     | 1.22   | 3.11 | 1.90     | 1.18   | 3.06 |
| Later exposure                     | 1.36     | 0.84   | 2.22 | 1.32     | 0.81   | 2.16 |
| Inconsistent exposure              | 2.01     | 1.27   | 3.17 | 2.01     | 1.27   | 3.17 |
| Early and later exposure           | 2.41     | 1.56   | 3.73 | 2.26     | 1.45   | 3.52 |
| <i>Disorders of the spine</i>      |          |        |      |          |        |      |
| No exposure                        | 1        |        |      | 1        |        |      |
| Early exposure                     | 2.43     | 1.17   | 5.05 | 2.37     | 1.14   | 4.95 |
| Later exposure                     | 2.54     | 1.30   | 4.96 | 2.48     | 1.26   | 4.88 |
| Inconsistent exposure              | 2.36     | 1.15   | 4.85 | 2.38     | 1.15   | 4.89 |
| Early and later exposure           | 3.51     | 1.81   | 6.83 | 3.29     | 1.67   | 6.48 |
| <i>Upper extremity disorders</i>   |          |        |      |          |        |      |
| No exposure                        | 1        |        |      | 1        |        |      |
| Early exposure                     | 3.75     | 1.28   | 11.0 | 3.38     | 1.14   | 10.1 |
| Later exposure                     | 2.48     | 0.80   | 7.64 | 2.22     | 0.72   | 6.87 |
| Inconsistent exposure              | 2.46     | 0.74   | 8.17 | 2.27     | 0.68   | 7.62 |
| Early and later exposure           | 6.12     | 2.33   | 16.0 | 4.84     | 1.81   | 12.9 |

\* Model 1 adjusted for age and sex

† Model 2 adjusted for age, sex, smoking, BMI, and parental occupational class

1 STROBE Statement— Halonen JI et al. Exposure to heavy physical work from early to later  
 2  
 3 adulthood and primary health care visits due to musculoskeletal diseases in midlife: a register linked  
 4  
 5 study  
 6  
 7

|                              | Item No | Recommendation                                                                                                                                                                                                                                                                                                                                                                                                      |
|------------------------------|---------|---------------------------------------------------------------------------------------------------------------------------------------------------------------------------------------------------------------------------------------------------------------------------------------------------------------------------------------------------------------------------------------------------------------------|
| <b>Title and abstract</b>    | 1       | (a) Indicate the study's design with a commonly used term in the title or the abstract <b>SEE Abstract on p. 2</b><br>(b) Provide in the abstract an informative and balanced summary of what was done and what was found <b>SEE Abstract on p. 2</b>                                                                                                                                                               |
| <b>Introduction</b>          |         |                                                                                                                                                                                                                                                                                                                                                                                                                     |
| Background/rationale         | 2       | Explain the scientific background and rationale for the investigation being reported <b>SEE p. 4</b>                                                                                                                                                                                                                                                                                                                |
| Objectives                   | 3       | State specific objectives, including any pre-specified hypotheses <b>SEE p. 5</b>                                                                                                                                                                                                                                                                                                                                   |
| <b>Methods</b>               |         |                                                                                                                                                                                                                                                                                                                                                                                                                     |
| Study design                 | 4       | Present key elements of study design early in the paper <b>SEE p. 5 for description of the study cohort</b>                                                                                                                                                                                                                                                                                                         |
| Setting                      | 5       | Describe the setting, locations, and relevant dates, including periods of recruitment, exposure, follow-up, and data collection <b>SEE pp. 5-6 (setting), 6 (exposure), 6-7 (outcomes and follow-up)</b>                                                                                                                                                                                                            |
| Participants                 | 6       | (a) Give the eligibility criteria, and the sources and methods of selection of participants. Describe methods of follow-up <b>SEE p. 5</b><br>(b) For matched studies, give matching criteria and number of exposed and unexposed <b>NA</b>                                                                                                                                                                         |
| Variables                    | 7       | Clearly define all outcomes, exposures, predictors, potential confounders, and effect modifiers. Give diagnostic criteria, if applicable <b>SEE pp. 6 (exposure), 6-7 (outcome), 8 (covariates)</b>                                                                                                                                                                                                                 |
| Data sources/<br>measurement | 8*      | For each variable of interest, give sources of data and details of methods of assessment (measurement). Describe comparability of assessment methods if there is more than one group <b>SEE pp. 5 (setting), 6 (exposure), 6-7 (outcomes), 8 (covariates)</b>                                                                                                                                                       |
| Bias                         | 9       | Describe any efforts to address potential sources of bias <b>SEE pp. 8-9 (covariate adjustments and alternative analysis method)</b>                                                                                                                                                                                                                                                                                |
| Study size                   | 10      | Explain how the study size was arrived at <b>SEE p. 5 and Figure 1 (flow chart)</b>                                                                                                                                                                                                                                                                                                                                 |
| Quantitative variables       | 11      | Explain how quantitative variables were handled in the analyses. If applicable, describe which groupings were chosen and why <b>SEE pp. 6 (exposure), 6-7 (outcomes), 8 (covariates)</b>                                                                                                                                                                                                                            |
| Statistical methods          | 12      | (a) Describe all statistical methods, including those used to control for confounding <b>SEE pp. 8-9</b><br>(b) Describe any methods used to examine subgroups and interactions <b>SEE pp. 8-9</b><br>(c) Explain how missing data were addressed <b>SEE p. 8 (covariates)</b><br>(d) If applicable, explain how loss to follow-up was addressed <b>NA</b><br>(e) Describe any sensitivity analyses <b>SEE p. 9</b> |

## Results



|    |                          |     |                                                                                                                                                                                                                                 |
|----|--------------------------|-----|---------------------------------------------------------------------------------------------------------------------------------------------------------------------------------------------------------------------------------|
| 1  | Participants             | 13* | (a) Report numbers of individuals at each stage of study—eg numbers potentially eligible, examined for eligibility, confirmed eligible, included in the study, completing follow-up, and analysed <b>SEE p. 5 and Figure 1</b>  |
| 2  |                          |     | (b) Give reasons for non-participation at each stage <b>NA</b>                                                                                                                                                                  |
| 3  |                          |     | (c) Consider use of a flow diagram <b>Figure 1 is a flow diagram</b>                                                                                                                                                            |
| 4  |                          |     |                                                                                                                                                                                                                                 |
| 5  |                          |     |                                                                                                                                                                                                                                 |
| 6  |                          |     |                                                                                                                                                                                                                                 |
| 7  | Descriptive data         | 14* | (a) Give characteristics of study participants (eg demographic, clinical, social) and information on exposures and potential confounders <b>SEE p. 9 and Table 1</b>                                                            |
| 8  |                          |     | (b) Indicate number of participants with missing data for each variable of interest <b>Those with missing data were excluded, see page 5 and Figure 1.</b>                                                                      |
| 9  |                          |     | (c) Summarise follow-up time (eg, average and total amount) <b>NA</b>                                                                                                                                                           |
| 10 |                          |     |                                                                                                                                                                                                                                 |
| 11 | Outcome data             | 15* | Report numbers of outcome events or summary measures over time <b>SEE Table 2.</b>                                                                                                                                              |
| 12 |                          |     |                                                                                                                                                                                                                                 |
| 13 | Main results             | 16  | (a) Give unadjusted estimates and, if applicable, confounder-adjusted estimates and their precision (eg, 95% confidence interval). Make clear which confounders were adjusted for and why they were included <b>SEE Table 3</b> |
| 14 |                          |     | (b) Report category boundaries when continuous variables were categorized <b>See pp. 6 (exposure), 8 (covariates)</b>                                                                                                           |
| 15 |                          |     | (c) If relevant, consider translating estimates of relative risk into absolute risk for a meaningful time period <b>Unadjusted absolute risks provided in the abstract on page 2 and on page 9.</b>                             |
| 16 |                          |     |                                                                                                                                                                                                                                 |
| 17 | Other analyses           | 17  | Report other analyses done—eg analyses of subgroups and interactions, and sensitivity analyses <b>SEE p. 9 and supplemental Table 1.</b>                                                                                        |
| 18 |                          |     |                                                                                                                                                                                                                                 |
| 19 |                          |     |                                                                                                                                                                                                                                 |
| 20 |                          |     |                                                                                                                                                                                                                                 |
| 21 |                          |     |                                                                                                                                                                                                                                 |
| 22 |                          |     |                                                                                                                                                                                                                                 |
| 23 |                          |     |                                                                                                                                                                                                                                 |
| 24 |                          |     |                                                                                                                                                                                                                                 |
| 25 |                          |     |                                                                                                                                                                                                                                 |
| 26 |                          |     |                                                                                                                                                                                                                                 |
| 27 |                          |     |                                                                                                                                                                                                                                 |
| 28 | <b>Discussion</b>        |     |                                                                                                                                                                                                                                 |
| 29 | Key results              | 18  | Summarise key results with reference to study objectives <b>SEE p. 10</b>                                                                                                                                                       |
| 30 |                          |     |                                                                                                                                                                                                                                 |
| 31 | Limitations              | 19  | Discuss limitations of the study, taking into account sources of potential bias or imprecision. Discuss both direction and magnitude of any potential bias <b>SEE pp. 11-12</b>                                                 |
| 32 |                          |     |                                                                                                                                                                                                                                 |
| 33 |                          |     |                                                                                                                                                                                                                                 |
| 34 | Interpretation           | 20  | Give a cautious overall interpretation of results considering objectives, limitations, multiplicity of analyses, results from similar studies, and other relevant evidence <b>SEE p. 13</b>                                     |
| 35 |                          |     |                                                                                                                                                                                                                                 |
| 36 |                          |     |                                                                                                                                                                                                                                 |
| 37 |                          |     |                                                                                                                                                                                                                                 |
| 38 | Generalizability         | 21  | Discuss the generalizability (external validity) of the study results <b>SEE p. 12</b>                                                                                                                                          |
| 39 |                          |     |                                                                                                                                                                                                                                 |
| 40 | <b>Other information</b> |     |                                                                                                                                                                                                                                 |
| 41 | Funding                  | 22  | Give the source of funding and the role of the funders for the present study and, if applicable, for the original study on which the present article is based <b>SEE p. 14</b>                                                  |
| 42 |                          |     |                                                                                                                                                                                                                                 |
| 43 |                          |     |                                                                                                                                                                                                                                 |
| 44 |                          |     |                                                                                                                                                                                                                                 |

\*Give information separately for exposed and unexposed groups.

**Note:** An Explanation and Elaboration article discusses each checklist item and gives methodological background and published examples of transparent reporting. The STROBE checklist is best used in conjunction with this article (freely available on the Web sites of PLoS Medicine at <http://www.plosmedicine.org/>, Annals of Internal Medicine at <http://www.annals.org/>, and Epidemiology at <http://www.epidem.com/>). Information on the STROBE Initiative is available at <http://www.strobe-statement.org>.

# BMJ Open

## Exposure to heavy physical work from early to later adulthood and primary health care visits due to musculoskeletal diseases in midlife: a register linked study

|                                 |                                                                                                                                                                                                                                                                                                                                                                                                                                                                                                                                                                                                                                                                                                                                                                                                                                                                                                                                                                                                                             |
|---------------------------------|-----------------------------------------------------------------------------------------------------------------------------------------------------------------------------------------------------------------------------------------------------------------------------------------------------------------------------------------------------------------------------------------------------------------------------------------------------------------------------------------------------------------------------------------------------------------------------------------------------------------------------------------------------------------------------------------------------------------------------------------------------------------------------------------------------------------------------------------------------------------------------------------------------------------------------------------------------------------------------------------------------------------------------|
| Journal:                        | <i>BMJ Open</i>                                                                                                                                                                                                                                                                                                                                                                                                                                                                                                                                                                                                                                                                                                                                                                                                                                                                                                                                                                                                             |
| Manuscript ID                   | bmjopen-2019-031564.R2                                                                                                                                                                                                                                                                                                                                                                                                                                                                                                                                                                                                                                                                                                                                                                                                                                                                                                                                                                                                      |
| Article Type:                   | Research                                                                                                                                                                                                                                                                                                                                                                                                                                                                                                                                                                                                                                                                                                                                                                                                                                                                                                                                                                                                                    |
| Date Submitted by the Author:   | 06-Aug-2019                                                                                                                                                                                                                                                                                                                                                                                                                                                                                                                                                                                                                                                                                                                                                                                                                                                                                                                                                                                                                 |
| Complete List of Authors:       | Halonen, Jaana; Finnish Institute of Occupational Health<br>Shiri, Rahman; Finnish Institute of Occupational Health, Centre of Expertise for Health and Work Ability<br>Mänty, Minna; University of Helsinki, Department of Public Health<br>Sumanen, Hilla; South-Eastern Finland University of Applied Sciences, Health care and emergency care; University of Helsinki, Public Health<br>Solovieva, Svetlana; Finnish Institute of Occupational Health, Center of Expertise for Health and workability<br>Viikari-Juntura, Eira; Finnish Institute of Occupational Health,<br>Kahonen, Mika; University of Tampere , Department of Clinical Physiology; Tampere University Hospital<br>Lehtimäki, Terho<br>Raitakari, Olli; University of Turku, Research Centre of Applied and Preventive Cardiovascular Medicine; Turku University Hospital, Department of Clinical Physiology and Nuclear Medicine<br>Lallukka, Tea; Työterveyslaitos ; Helsingin Yliopisto Laaketieteellinen tiedekunta, Department of Public Health |
| <b>Primary Subject Heading</b>: | Occupational and environmental medicine                                                                                                                                                                                                                                                                                                                                                                                                                                                                                                                                                                                                                                                                                                                                                                                                                                                                                                                                                                                     |
| Secondary Subject Heading:      | Epidemiology                                                                                                                                                                                                                                                                                                                                                                                                                                                                                                                                                                                                                                                                                                                                                                                                                                                                                                                                                                                                                |
| Keywords:                       | Musculoskeletal disorders < ORTHOPAEDIC & TRAUMA SURGERY, Physical work, Spine < ORTHOPAEDIC & TRAUMA SURGERY, Upper extremity, OCCUPATIONAL & INDUSTRIAL MEDICINE                                                                                                                                                                                                                                                                                                                                                                                                                                                                                                                                                                                                                                                                                                                                                                                                                                                          |
|                                 |                                                                                                                                                                                                                                                                                                                                                                                                                                                                                                                                                                                                                                                                                                                                                                                                                                                                                                                                                                                                                             |

SCHOLARONE™  
Manuscripts

1  
2  
3 *Research article: BMJ Open*  
4

5 Exposure to heavy physical work from early to later adulthood and primary  
6 health care visits due to musculoskeletal diseases in midlife: a register linked  
7  
8 study  
9  
10  
11  
12

13 Jaana I. Halonen,<sup>1</sup> Rahman Shiri,<sup>1</sup> Minna Mänty,<sup>2,3</sup> Hilla Sumanen,<sup>3,4</sup> Svetlana Solovieva,<sup>1</sup>

14 Eira Viikari-Juntura,<sup>1</sup> Mika Kähönen,<sup>5</sup> Terho Lehtimäki,<sup>6</sup> Olli T. Raitakari,<sup>7,8,9</sup> Tea

15 Lallukka<sup>1,3</sup>  
16  
17  
18  
19

20 1 Finnish Institute of Occupational Health, Helsinki, Finland

21 2 City of Vantaa, Finland

22 3 Department of Public Health, University of Helsinki, Helsinki, Finland

23 4 South-Eastern Finland University of Applied Sciences, Kotka, Finland

24 5 Department of Clinical Physiology, Tampere University Hospital, and Finnish  
25 Cardiovascular Research Center - Tampere, Faculty of Medicine and Health Technology,  
26 Tampere University, Tampere 33521, Finland

27 6 Department of Clinical Chemistry, Fimlab Laboratories, and Finnish Cardiovascular  
28 Research Center - Tampere, Faculty of Medicine and Health Technology, Tampere  
29 University, Tampere 33520, Finland

30 7 Centre for Population Health Research, University of Turku and Turku University Hospital,  
31 Turku, Finland.

32 8 Research Centre of Applied and Preventive Cardiovascular Medicine, University of Turku,  
33 Turku, Finland.

34 9 Department of Clinical Physiology and Nuclear Medicine, Turku University Hospital,  
35 Turku, Finland.  
36  
37  
38  
39  
40

41 Corresponding author: Jaana I. Halonen, address: Finnish Institute of Occupational Health,  
42 70032 TYÖTERVEYSLAITOS, Finland  
43  
44

45 E-mail: [jaana.halonen@ttl.fi](mailto:jaana.halonen@ttl.fi) Telephone: +358 43 82 44 264  
46  
47  
48  
49

50 **Running title** Physical work from early to later adulthood and musculoskeletal visits  
51  
52

53 **Word count** 2834  
54  
55  
56  
57  
58  
59  
60

**Abstract (280/300)**

**Objectives:** To examine whether exposure to heavy physical work from early to later adulthood is associated with primary health care visits due to cause-specific musculoskeletal diseases in midlife.

**Design:** Prospective cohort study

**Setting:** Nationally representative Young Finns Study cohort, Finland.

**Participants:** 1056 participants of the Young Finns Study cohort.

**Exposure measure:** Physical work exposure was surveyed in early (18–24 years old, 1986 or 1989) and later adulthood (2007 and 2011), and it was categorized as: “no exposure”, “early exposure only”, “later exposure only”, and “early and later exposure”.

**Primary and secondary outcome measures:** Visits due to any musculoskeletal disease and separately due to spine disorders, and upper extremity disorders were followed-up from national primary health care register from the date of the third survey in 2011 until 2014.

**Results:** Prevalence of any musculoskeletal disease during the follow-up was 20%, that for spine disorders 10%, and that for upper extremity disorders 5%. Those with physically heavy work in early adulthood only had an increased risk of any musculoskeletal disease (risk ratio (RR) 1.55, 95% confidence interval (CI) 1.05–2.28) after adjustment for age, sex, smoking, body mass index, physical activity, and parental occupational class. Later exposure only was associated with visits due to any musculoskeletal disease (RR 1.46, 95% CI 1.01–2.12) and spine disorders (RR 2.40, 95% CI 1.41–4.06). Early and later exposure was associated with all three outcomes: RRs 1.99 (95% CI 1.44–2.77) for any musculoskeletal disease, 2.43 (95% CI 1.42–4.14) for spine disorders, and 3.97 (95% CI 1.86–8.46) for upper extremity disorders.

1  
2  
3 **Conclusions:** To reduce burden of musculoskeletal diseases, preventive actions to reduce  
4 exposure to or mitigate the consequences of physically heavy work throughout the work  
5 career are needed.  
6  
7

8  
9  
10 **Key words:** musculoskeletal; physical work; spine disorder; upper extremity  
11  
12

### 13 14 **Strengths and limitations of this study**

- 15  
16  
17 • We used self-reported assessment of physical heaviness of work that was based on a  
18 single question, which is why the specificity of the exposure, e.g. regarding exposure  
19 of different parts of the body, is low.  
20  
21
- 22  
23  
24 • We cannot rule out the possibility of changes in the exposure or outcomes between  
25 the survey waves.  
26  
27
- 28  
29  
30 • The setting enabled us to prospectively examine the long-term consequences of  
31 exposure to early and later physical work and midlife musculoskeletal health  
32 problems that were objectively measured.  
33  
34
- 35  
36  
37 • The used cohort data were representative of the general population with relatively  
38 little loss to follow-up.  
39  
40  
41  
42  
43  
44  
45  
46  
47  
48  
49  
50  
51  
52  
53  
54  
55  
56  
57  
58  
59  
60

## Introduction

Musculoskeletal diseases (MSD) are, along with mental disorders, the leading cause of work disability<sup>1</sup> measured as sickness absence<sup>2</sup> and disability retirements.<sup>3</sup> In the European Union, the estimated total cost of lost productivity attributable to MSD among working-aged people can be up to 2% of gross domestic product (GDP).<sup>4</sup> Contextual factors, particularly those related to workplace, have been identified as risk factors for sickness absence and disability retirement due to musculoskeletal problems<sup>5,6</sup> as well as for musculoskeletal pain.<sup>7</sup> We have reported findings where early and cumulative exposure to physical work were associated with low back pain at midlife.<sup>8</sup> However, pain as an outcome is always self-reported, as well as a common condition. Thus, objective outcome measures are needed to confirm whether the effects of early and cumulative physical work are similar for more severe and objectively assessed MSD outcomes.

Only few studies to date have been able to assess the associations between cumulative exposure to physical work and MSD. A recent study used a job exposure matrix to assess exposure at the level of occupational title and disability retirement due to MSD,<sup>6</sup> but even the first exposure measurements were mainly from midlife. In another study, two individual-level measurements were used to examine the associations between long-term exposure to high physical workload in midlife and risk of disability retirement due to MSD after age of 61,<sup>9</sup> while younger employees were not included. Yet another study used individual-level physical work exposure data that were retrospectively assessed, and observed that cumulative exposure may increase the risk of sickness absence and disability retirement, but results for cause-specific outcomes were not reported.<sup>10</sup> In addition to the lack of cumulative exposure data, prior studies have rarely accounted for family background although parental socioeconomic position has been linked, for example, to later

1  
2  
3 musculoskeletal problems<sup>11</sup> and widespread pain<sup>12</sup> as well as career possibilities<sup>13</sup> and  
4  
5 choices.<sup>14</sup>  
6

7  
8 To fill these gaps in evidence, we examined whether physical heaviness of work  
9  
10 from early adulthood to later adulthood is associated with primary health care visits due to  
11  
12 MSD in midlife. We hypothesized that early, later and repeated exposure to heavy work is  
13  
14 associated with later health care visits. Any MSD was examined as one outcome group, but  
15  
16 we also included two cause-specific groups: disorders of the spine and upper extremities. The  
17  
18 contribution of behavioural factors and parental socioeconomic position in these associations  
19  
20 were considered.  
21  
22  
23  
24  
25

## 26 **Methods**

### 27 **Participants**

28  
29 Data for this study are derived from the Young Finns Study.<sup>15</sup> Cohort baseline data were  
30  
31 collected in 1980 in six age strata: 3, 6, 9, 12, 15, and 18 years resulting in 3596 participants  
32  
33 (response rate 83%). For this study, we included all those who were 18, 21 or 24 years when  
34  
35 responding to the survey in 1986 (early adulthood). These data were completed by including  
36  
37 also those who turned 18 years and responded to the survey in 1989 (**Figure 1**). The age-  
38  
39 based selection criterion was applied as the focus of this study was on early work-related  
40  
41 exposures. Further inclusion criterion required that the participants responded to the question  
42  
43 on physical heaviness of work in 1986 or 1989 (early adulthood exposure, N=1119), and in  
44  
45 2007 (later adulthood exposure, N=1090) and/or in 2011 (later adulthood exposure, N=1042),  
46  
47 which resulted in a total of 10854 participants. After excluding those with missing data on  
48  
49 any covariate (after re-coding and imputation), the final study sample was 1056 cohort  
50  
51 participants (with 5171 observations) who all had work exposure measurement from early  
52  
53  
54  
55  
56  
57  
58  
59  
60

1  
2  
3 adulthood and at least one measurement from later adulthood. The study has been ethically  
4  
5 approved by the Ethics Committee of the Hospital District of Southwest Finland.  
6  
7  
8  
9

#### 10 Patient and Public Involvement statement

11  
12 Patients or the public were not involved in the development of the research question or the  
13  
14 design of this study nor in the conduct of the study.  
15  
16  
17

#### 18 Exposure

19  
20 Physical heaviness of work was enquired at waves 1 to 3 with a single question: “How heavy  
21  
22 is your work physically?”. There were six response alternatives: 1) light sedentary work, 2)  
23  
24 other sedentary work, 3) physically light work, involving standing and moving, 4) medium  
25  
26 heavy work involving moving, 5) physically heavy work, and 6) physically very heavy work.  
27  
28 The responses were categorized as: sedentary/physically light work, and medium to heavy  
29  
30 physical work. We used responses from all three waves to form a five-class exposure variable  
31  
32 categorized as: “no exposure”, when reporting sedentary/physically light work in all three  
33  
34 waves, “early exposure only”, when reporting medium to heavy physical work only in wave  
35  
36 1, “later exposure only”, when reporting medium to heavy physical work in waves 2 or 3  
37  
38 (89% responded to both waves 2 and 3), and “early and later exposure” when reporting  
39  
40 medium to heavy physical work in wave 1 and in later adulthood in wave 2 and/or 3. All  
41  
42 other possible response combinations formed a group “inconsistent exposure”.  
43  
44  
45  
46  
47  
48  
49  
50

#### 51 Outcomes

52  
53 We examined primary health care visits due to a musculoskeletal diagnosis. The follow-up  
54  
55 started from the day after returning wave 3 survey in 2011. Repeated visits were used for the  
56  
57 main analyses. For an alternative analysis, time to the first visit was used as an outcome, and  
58  
59  
60



1  
2  
3 the follow-up from returning the survey in 2011 continued until the first primary health care  
4 visit, death (from Statistics Finland) or end of the follow-up (end of 2014), whichever  
5 occurred first. Data were obtained from the register of primary health care visits (Avohilmo)  
6 maintained by National Institute for Health and Welfare.<sup>16</sup> Diagnosis-specific data have been  
7 collected and were available from 2011 onwards. Visits due to *any musculoskeletal diagnosis*  
8 by International Classification of Diseases (ICD) version 10 codes M00-M99 were examined  
9 over the follow-up period. Additionally, two cause-specific outcome groups with the largest  
10 numbers of events were: 1) disorders of the spine and 2) upper extremity disorders. *Disorders*  
11 *of the spine* included any of the following diseases, surgeries or treatments (ICD-10 code):  
12 cervical disc disorders (M50), lumbar and other intervertebral disc disorders with  
13 radiculopathy (M51.1), other specified intervertebral disc displacement (M51.2), disc  
14 degeneration (M51.3), disc disorders (M51.8), intervertebral disc disorder, unspecified  
15 (M51.9), disc disorder/ disc disease (back disorders with radiation: M50, M51), other  
16 dorsopathies (M53), back pain / dorsalgia (back disorders without radiation: M54.1, M54.2,  
17 M54.3, M54.4, M54.5, M54.6, M54.8, M54.9), and lumbar disc herniation or sciatica  
18 (M51.1, M51.2, M54.3, and M54.4). *Upper extremity disorders* included any of the following  
19 diseases, surgeries or treatments: carpal tunnel syndrome, carpal tunnel release (G56.0,  
20 ACC51, ACC59), shoulder disorder (M75), medial epicondylitis, lateral epicondylitis, and  
21 periarthritis of wrist (M77.0, M77.1, M77.2, or M77.3). Additionally, the numbers of visits  
22 due to osteoarthritis (M15, M16, M17, M18) were examined, but found to be too low for  
23 statistical analyses (see Table 1).

## 53 Covariates

54 From the questionnaires we obtained information on possible confounders. We included sex  
55 and age at wave 1, and parental occupational status in childhood (1=upper non-manual,  
56  
57  
58  
59  
60

1  
2  
3 2=lower non-manual, 3=upper manual, 4=lower manual). Smoking (ever smoker vs. non-  
4  
5 smoker) and body mass index (BMI, kg/m<sup>2</sup> based on measured weight and height) were  
6  
7 included as time varying covariates collected at baseline, 2001, 2007 and 2011. Measure for  
8  
9 leisure-time physical activity (PA) was based on a set of questions requesting the frequency  
10  
11 and intensity of PA, frequency of vigorous PA, hours spent on vigorous PA, average duration  
12  
13 of a PA session, and participation in organized PA. Based on these questions a *physical*  
14  
15 *activity index* was calculated (range 5-15, larger value indicating greater activity).<sup>17</sup> For PA,  
16  
17 we used the maximum of the three measurements of the PA index in adulthood (2001, 2007  
18  
19 and 2011), as these data had plenty of missing values (N missing =730 in 2001, 150 in 2007  
20  
21 and 475 in 2011), but the patterns of PA have been observed to remain constant in  
22  
23 adulthood.<sup>18</sup> Missing data on smoking were re-coded as “non-smoker”. Number of missing  
24  
25 observations varied by phase from 5 in 2007 to 369 in 1986, some of which were excluded  
26  
27 due to missing data on other covariates. Missing data on BMI were imputed using mean of  
28  
29 the study sample in the corresponding survey. Number of missing observations varied from 0  
30  
31 in 2001 to 411 in 1989, some of which were excluded due to missing data on other  
32  
33 covariates. Although this is not the strongest imputation method we considered it was the  
34  
35 most applicable one, as the method only concerned one covariate. All these covariates have  
36  
37 been linked to back problems in prior studies<sup>11 19-21</sup> and smoking can be also considered as an  
38  
39 indicator of low socioeconomic position, which may affect the choice of employment and  
40  
41 further physical workload.  
42  
43  
44  
45  
46  
47  
48  
49  
50

## 51 Statistical analyses

52  
53 We used generalized estimating equation (GEE) models with Poisson distribution to assess  
54  
55 associations between the five-class physical work exposure, “no exposure” serving as the  
56  
57 reference group, and repeated primary health care visits due to MSD. This method was  
58  
59  
60

1  
2  
3 chosen as the GEE models permit specification of a working correlation matrix that accounts  
4  
5 for the form of within-subject correlation of responses on dependent variables of many  
6  
7 different distributions, including Poisson.<sup>22</sup> We ran models separately for all musculoskeletal  
8  
9 visits, for disorders of the spine, and for upper extremity disorders. Two model specifications  
10  
11 were used: Model 1 was adjusted for sex and age at baseline, Model 2 was additionally  
12  
13 adjusted for parental occupational class, physical activity, and time-varying smoking and  
14  
15 BMI. Results are presented as risk ratios (RR) with 95% confidence intervals (CI). As an  
16  
17 alternative method, we ran the analyses using Cox proportional hazard models using time to  
18  
19 the first visit as the outcome, which resulted in very similar findings (supplemental Table 1).  
20  
21  
22  
23  
24  
25

## 26 **Results**

27  
28 Descriptive statistics of the analysis sample in total and by sex are shown in Table 1. At  
29  
30 baseline, mean age was 20.5 (SD=2.9) years, and mean BMI 22.4 (SD=2.3), while the mean  
31  
32 BMI during the follow-up was 25.5 (SD=4.8). Mean follow-up time for first visits due to any  
33  
34 MSD was 3.2 (SD=0.87) years, due to spine disorders 3.4 (SD=0.63) years, and due to upper  
35  
36 extremity disorders 3.4 (SD=0.50) years. In the total sample, prevalence of any  
37  
38 musculoskeletal disease during the follow-up was 20%, that for spine disorders 10%, and that  
39  
40 for upper extremity disorders 5%. Distributions of the outcomes and proportions of events in  
41  
42 each of the five exposure groups in total and by sex are presented in Table 2. As shown in  
43  
44 Table 2, the low numbers of events prevented sex-specific analyses.  
45  
46  
47  
48

49 Associations between physical heaviness of work and primary health care visits  
50  
51 due to the three outcome groups are presented in Table 3. Overall, the age- and sex-adjusted  
52  
53 estimates (Model 1) were slightly attenuated after including parental occupational status  
54  
55 smoking, BMI and physical activity (Model 2). We observed an association between early  
56  
57 exposure only and any musculoskeletal disorders (fully adjusted RR 1.55, 95% CI 1.05–2.28)  
58  
59  
60

1  
2  
3 and a slightly weaker association for later exposure only (RR 1.46, 95% 1.01–2.12). Early  
4  
5 and later exposure had the strongest association with any visits due to MSD (RR 1.99, 95%  
6  
7 CI 1.44–2.77).  
8  
9

10 For disorders of the spine, we observed an association for later exposure only  
11  
12 (RR 2.40, 95% CI 1.41–4.06), inconsistent exposure (RR 2.30, 95% CI 1.34–3.95), and early  
13  
14 and later exposure (RR 2.43, 95% CI 1.42–4.14). Effect estimates for visits due to upper  
15  
16 extremity disorders were also positive, that for early and later exposure (HR 3.97, 95% CI  
17  
18 1.86–8.46) reaching statistical significance, although with a wide confidence interval.  
19  
20  
21  
22  
23

## 24 Discussion

25  
26 In this study, reporting both early and later exposure to heavy physical work was associated  
27  
28 with objectively measured MSDs requiring primary health care visit in midlife. In addition,  
29  
30 physical heaviness of work in early adulthood only was associated with an increased risk of  
31  
32 primary health care visit due to any MSD, and exposure in later adulthood only was  
33  
34 associated with any MSD and disorders of the spine. These diagnosis-specific findings are in  
35  
36 line with our prior findings for self-reported low back pain.<sup>8</sup> Although our current analyses  
37  
38 may have lacked power to detect precise associations, particularly for upper extremity  
39  
40 disorders, the findings suggest that physical work exposure is also a predictor of objectively  
41  
42 measured MSDs even after considering behavioural factors and parental socioeconomic  
43  
44 position.  
45  
46  
47  
48

49 Longitudinal studies on the associations between physical work exposures and  
50  
51 objectively measured MSDs are scarce. Specifically, we are not aware of studies that would  
52  
53 have collected and used data on work-related physical exposures of participants from early to  
54  
55 later adulthood, and health care visits due to MSDs in midlife. Some evidence exists  
56  
57 regarding physical work exposures and musculoskeletal pain or disorders at an early stage of  
58  
59  
60

1  
2  
3 the working career. In one cross-sectional study repetitive and asymmetric demands,  
4 including high probability of repetitive tasks, bending or rotation movements and manual  
5 materials handling, was associated with the presence of neck/shoulder pain and severity of  
6 upper- and lower-back pain among 21-year-old employees.<sup>23</sup> Another cross-sectional study  
7 among less than 30-year-old employees reported similar results regarding the association  
8 between physical work exposures (e.g. repetitive flexion or rotation movements of the trunk,  
9 and more than three years in a job including lifting more than 25 kg at least once an hour) and  
10 low back pain.<sup>24</sup> However, in these studies follow-up for mid-life musculoskeletal disorders  
11 was not available. Timing of outcome measurement seems essential as it is likely that there  
12 are differences in associations between physical work and MSD among 20-35, 36-49 and  
13 over 50-year old employees.<sup>25</sup>

14  
15  
16  
17  
18  
19  
20  
21  
22  
23  
24  
25  
26  
27  
28  
29  
30  
31  
32  
33  
34  
35  
36  
37  
38  
39  
40  
41  
42  
43  
44  
45  
46  
47  
48  
49  
50  
51  
52  
53  
54  
55  
56  
57  
58  
59  
60

Several studies have reported associations between physical work exposures and increased risk of objectively measured disability retirement due to MSD.<sup>5 26-28</sup> However, only one of these studies examined how exposure in early adulthood was associated with disability retirement due to MSD in mid-life.<sup>28</sup> Moreover, only a few studies have reported associations between cumulative exposure to physical work throughout the work career and objectively measured sickness absence or disability retirement in general,<sup>29</sup> or due to disability retirement due to MSD in particular.<sup>6</sup> These findings have been in line with ours, although the cumulative exposure in the study focusing on MSD was assessed using a job exposure matrix.

Some limitations of this study need to be acknowledged. We used self-reported assessment of physical heaviness of work that was based on a single question. Consequently, the specificity of the exposure, e.g. regarding exposure of different parts of the body, is low. Although such questions have widely been used in epidemiological studies and have indicated good validity,<sup>30</sup> this may partly explain the non-significant associations between

1  
2  
3 physical work and upper extremity disorders. We also used a dichotomized physical  
4  
5 heaviness of work measure where medium and heavy/very heavy work were combined as the  
6  
7 proportion of those with heavy/very heavy work was rather low (10% at early adulthood).  
8  
9 The used cut-off may have attenuated the observed associations if medium heavy work had  
10  
11 substantially weaker association with health care visits than heavy/very heavy work. We  
12  
13 cannot rule out the possibility of changes in the exposure or outcomes between the survey  
14  
15 waves, which may have caused under- or over-estimation of the associations. However, the  
16  
17 long follow-up enabled us to examine the long-term consequences of early and later physical  
18  
19 work and midlife musculoskeletal health problems that were objectively measured. Some  
20  
21 healthy worker effect may have attenuated the findings as we required minimum of two  
22  
23 responses (from early and later adulthood) regarding physical heaviness of work and those  
24  
25 with physically strenuous work or with musculoskeletal problems may have left employment  
26  
27 before the second survey. It can also be speculated that primary health care visits with  
28  
29 musculoskeletal diagnosis in midlife are mostly a result of pain complaints. Severe pain may  
30  
31 interfere with work activities and induce need for sickness absence, which may be the  
32  
33 primary motivation for the visit to a physician. Thus, the used outcomes may reflect the  
34  
35 severity of work disability due to a subjective measure of musculoskeletal pain. The follow-  
36  
37 up period for the outcomes was not very long and unobserved changes in the exposure or  
38  
39 covariates during the outcome follow-up could have caused some bias to the findings  
40  
41 resulting in under- or overestimation of the observed associations. However, the major  
42  
43 strength of this work is the prospective study design with three repeated assessments of  
44  
45 physical heaviness of work that were initiated in early adulthood. Moreover, the used cohort  
46  
47 data were representative of the general population with relatively little loss to follow-up.<sup>15</sup> As  
48  
49 we used register data, only persons who emigrate will no more have registered health care  
50  
51 visits. This suggests good generalizability to the Finnish working population, while more  
52  
53  
54  
55  
56  
57  
58  
59  
60

1  
2  
3 caution is needed when assessing generalizability to other countries with different health care  
4  
5 systems.  
6

7  
8 In summary, our findings suggest that exposure to heavy physical work over the  
9  
10 work career contributes to the high burden in the health care. Therefore, preventive actions  
11  
12 against musculoskeletal problems due to physically heavy work in early adulthood, later  
13  
14 adulthood and cumulatively throughout the work career are needed. One possible action,  
15  
16 specifically among young employees, might be good introduction to ergonomic ways to  
17  
18 work. Guidance on how to recover from physical work tasks is also important; for example,  
19  
20 at individual level recovery training has been seen beneficial to the employees.<sup>31</sup> At  
21  
22 organizational level, procedures enabling recovery during the work day could include task  
23  
24 variation and convenient work-break schedules,<sup>31</sup> which are likely to be applicable  
25  
26 throughout the work career.  
27  
28  
29  
30  
31

### 32 33 **A competing interest declaration**

34  
35 All authors have completed the Unified Competing Interest form at  
36  
37 [www.icmje.org/coi\\_disclosure.pdf](http://www.icmje.org/coi_disclosure.pdf) (available on request from the corresponding author) and  
38  
39 declare that (1) JIH and TLa have support from the Academy of Finland; (2) JIH and TLa  
40  
41 have no relationships with the Finnish Academy that might have an interest in the submitted  
42  
43 work in the previous 3 years; (3) their spouses, partners, or children have no financial  
44  
45 relationships that may be relevant to the submitted work; and (4) JIH, RS, HS, MM, SS, EV-  
46  
47 J, MK, TLe, OR and TLa have no non-financial interests that may be relevant to the  
48  
49 submitted work.  
50  
51  
52  
53  
54  
55

56 **Authors' contributions** JIH, RS, MM, HS, EV-J, SS and TLa conceived and designed the  
57  
58 experiments, TLa analysed the data, JIH wrote the first draft of the article, MK, TLe and OR  
59  
60

1  
2  
3 contributed materials and/or analysis tools. TLa, MK, TLe and OR contributed to the funding  
4  
5 of the study. TLa is the guarantor of the study. All authors were involved in interpretation of  
6  
7 the findings, writing the paper and approved the submitted and published versions.  
8  
9

10  
11  
12 **Funding** The research was funded by the Finnish Academy (grant numbers 287488 and  
13  
14 319200 for TLa and JIH). The Young Finns Study has been financially supported by the  
15  
16 Academy of Finland: grants 286284, 134309 (Eye), 126925, 121584, 124282, 129364,  
17  
18 129378 (Salve), 117787 (Gendi), and 41071 (Skidi); the Social Insurance Institution of  
19  
20 Finland; Competitive State Research Financing of the Expert Responsibility area of Kuopio,  
21  
22 Tampere and Turku University Hospitals (grant X51001); Juho Vainio Foundation; Paavo  
23  
24 Nurmi Foundation; Finnish Foundation for Cardiovascular Research; Finnish Cultural  
25  
26 Foundation; The Sigrid Juselius Foundation; Tampere Tuberculosis Foundation; Emil  
27  
28 Aaltonen Foundation; Yrjö Jahnsson Foundation; Signe and Ane Gyllenberg Foundation;  
29  
30 Diabetes Research Foundation of Finnish Diabetes Association; and EU Horizon 2020 (grant  
31  
32 755320 for TAXINOMISIS); and European Research Council (grant 742927 for  
33  
34 MULTIEPIGEN project); Tampere University Hospital Supporting Foundation.  
35  
36  
37  
38  
39  
40  
41

42 **Ethics approval** The study has received ethical approval from the Ethics Committee of the  
43  
44 Hospital District of Southwest Finland on September 21st, 2010.  
45  
46  
47  
48

49 **Data sharing** TLa had access to an anonymized subset of the data that were used for the  
50  
51 analyses. OTR had full access to all raw data. Raw data from the study are not available due  
52  
53 to confidentiality and sensitivity issues. Subset of raw data can be requested from OTR  
54  
55 olli.raitakari[at]utu.fi.  
56  
57  
58  
59  
60



1  
2  
3 **Acknowledgements** The authors thank statistician Niina Kartiosuo for her help with the  
4  
5 formation of the analysis dataset.  
6  
7  
8  
9

### 10 **Figure Legend**

11  
12 **Figure 1.** Flow chart of the sample selection.  
13  
14  
15  
16  
17  
18  
19  
20  
21  
22  
23  
24  
25  
26  
27  
28  
29  
30  
31  
32  
33  
34  
35  
36  
37  
38  
39  
40  
41  
42  
43  
44  
45  
46  
47  
48  
49  
50  
51  
52  
53  
54  
55  
56  
57  
58  
59  
60

For peer review only

## References

- 1 OECD. *Sickness, Disability and Work: Breaking the Barriers. A Synthesis of Findings across OECD Countries* OECD Publishing, Paris. 2010.
- 2 Linaker C, Harris EC, Cooper C, Coggon D, Palmer KT. The burden of sickness absence from musculoskeletal causes in Great Britain. *Occup Med (Lond)* 2011;61:458-64.
- 3 Statistics Finland. Recipients of disability pension 2018.
- 4 Bevan S. Economic impact of musculoskeletal disorders (MSDs) on work in Europe. *Best Pract Res Clin Rheumatol* 2015;29:356-73.
- 5 Foss L, Gravseth HM, Kristensen P et al. The impact of workplace risk factors on long-term musculoskeletal sickness absence: a registry-based 5-year follow-up from the Oslo health study. *J Occup Environ Med* 2011;53:1478-82.
- 6 Ervasti J, Pietilainen O, Rahkonen O et al. Long-term exposure to heavy physical work, disability pension due to musculoskeletal disorders and all-cause mortality: 20-year follow-up-introducing Helsinki Health Study job exposure matrix. *Int Arch Occup Environ Health* 2018.
- 7 Madsen IEH, Gupta N, Budtz-Jorgensen E et al. Physical work demands and psychosocial working conditions as predictors of musculoskeletal pain: a cohort study comparing self-reported and job exposure matrix measurements. *Occup Environ Med* 2018;75:752-758.
- 8 Lallukka T, Viikari-Juntura E, Viikari J et al. Early work-related physical exposures and low back pain in midlife: the Cardiovascular Risk in Young Finns Study. *Occup Environ Med* 2017;74:163-168.
- 9 Kjellberg K, Lundin A, Falkstedt D, Allebeck P, Hemmingsson T. Long-term physical workload in middle age and disability pension in men and women: a follow-up study of Swedish cohorts. *Int Arch Occup Environ Health* 2016;89:1239-1250.
- 10 Sundstrup E, Hansen AM, Mortensen EL et al. Retrospectively assessed physical work environment during working life and risk of sickness absence and labour market exit among older workers. *Occup Environ Med* 2018;75:114-123.
- 11 Lallukka T, Viikari-Juntura E, Raitakari OT et al. Childhood and adult socio-economic position and social mobility as determinants of low back pain outcomes. *Eur J Pain* 2014;18:128-38.
- 12 Power C, Atherton K, Strachan DP et al. Life-course influences on health in British adults: effects of socio-economic position in childhood and adulthood. *Int J Epidemiol* 2007;36:532-9.
- 13 Laukkonen M-L. Pienituloisten perheiden ylioppilaat välttävät riskiä pääsykokeita painottavissa opiskelijavalinnoissa [High school graduates from low income families evade risk related to student admission emphasizing entrance examinations]: ETLA 2018.
- 14 Whiston SC, Keller BK. The Influences of the Family of Origin on Career Development: A Review and Analysis. *The Counseling Psychologist* 2004;32:493-568.
- 15 Raitakari OT, Juonala M, Rönnemaa T et al. Cohort profile: the cardiovascular risk in Young Finns Study. *Int J Epidemiol* 2008;37:1220-6.
- 16 National Institute for Health and Welfare. Register of Primary Health Care visits, Helsinki: National Institute for Health and Welfare 2019.
- 17 Rovio SP, Yang X, Kankaanpää A et al. Longitudinal physical activity trajectories from childhood to adulthood and their determinants: The Young Finns Study. *Scand J Med Sci Sports* 2018;28:1073-1083.
- 18 Telama R, Yang X, Leskinen E et al. Tracking of physical activity from early childhood through youth into adulthood. *Med Sci Sports Exerc* 2014;46:955-62.
- 19 Shiri R, Karppinen J, Leino-Arjas P, Solovieva S, Viikari-Juntura E. The association between smoking and low back pain: a meta-analysis. *Am J Med* 2010;123:87.e7-35.
- 20 -. The association between obesity and low back pain: a meta-analysis. *Am J Epidemiol* 2010;171:135-54.

- 1  
2  
3 21 Shiri R, Euro U, Heliövaara M et al. Lifestyle Risk Factors Increase the Risk of Hospitalization  
4 for Sciatica: Findings of Four Prospective Cohort Studies. *Am J Med* 2017;130:1408-1414.e6.  
5 22 Ballinger GA. Using Generalized Estimating Equations for Longitudinal Data Analysis.  
6 *Organizational Research Methods* 2004;7:127-150.  
7 23 Lourenco S, Araujo F, Severo M, Cunha Miranda L, Carnide F, Lucas R. Patterns of  
8 biomechanical demands are associated with musculoskeletal pain in the beginning of  
9 professional life: a population-based study. *Scand J Work Environ Health* 2015;41:234-46.  
10 24 Van Nieuwenhuysse A, Fatkhutdinova L, Verbeke G et al. Risk factors for first-ever low back  
11 pain among workers in their first employment. *Occup Med (Lond)* 2004;54:513-9.  
12 25 Oakman J, Neupane S, Nygard CH. Does age matter in predicting musculoskeletal disorder  
13 risk? An analysis of workplace predictors over 4 years. *Int Arch Occup Environ Health*  
14 2016;89:1127-36.  
15 26 Lahelma E, Laaksonen M, Lallukka T et al. Working conditions as risk factors for disability  
16 retirement: a longitudinal register linkage study. *BMC Public Health* 2012;12:309.  
17 27 Robroek SJW, Jarvholm B, van der Beek AJ, Proper KI, Wahlstrom J, Burdorf A. Influence of  
18 obesity and physical workload on disability benefits among construction workers followed  
19 up for 37 years. *Occup Environ Med* 2017;74:621-627.  
20 28 Ropponen A, Svedberg P, Koskenvuo M, Silventoinen K, Kaprio J. Physical work load and  
21 psychological stress of daily activities as predictors of disability pension due to  
22 musculoskeletal disorders. *Scand J Public Health* 2014;42:370-6.  
23 29 Sundstrup E, Hansen AM, Mortensen EL et al. Cumulative occupational mechanical  
24 exposures during working life and risk of sickness absence and disability pension:  
25 prospective cohort study. *Scand J Work Environ Health* 2017;43:415-425.  
26 30 Stock SR, Fernandes R, Delisle A, Vezina N. Reproducibility and validity of workers' self-  
27 reports of physical work demands. *Scand J Work Environ Health* 2005;31:409-37.  
28 31 Verbeek J, Ruotsalainen J, Laitinen J et al. Interventions to enhance recovery in healthy  
29 workers; a scoping review. *Occup Med (Lond)* 2018.  
30  
31  
32  
33  
34  
35  
36  
37  
38  
39  
40  
41  
42  
43  
44  
45  
46  
47  
48  
49  
50  
51  
52  
53  
54  
55  
56  
57  
58  
59  
60

**Table 1.** Descriptive statistics of the study population at baseline.

| Variable                                   | All  |     |
|--------------------------------------------|------|-----|
|                                            | N    | %   |
| Total individuals                          | 1065 | 100 |
| Women                                      | 446  | 42  |
| Men                                        | 610  | 58  |
| Parental occupational status               |      |     |
| upper non-manual                           | 152  | 14  |
| lower non-manual                           | 447  | 42  |
| upper manual                               | 282  | 27  |
| lower manual                               | 175  | 17  |
| Ever smokers                               | 516  | 49  |
| Low physical activity index*               | 710  | 67  |
| Cumulative exposure to heavy physical work |      |     |
| No exposure                                | 523  | 49  |
| Early exposure only                        | 124  | 13  |
| Later exposure only                        | 130  | 12  |
| Inconsistent exposure                      | 118  | 11  |
| Early and later exposure                   | 161  | 15  |
| Outcomes (-)                               |      |     |
| Any musculoskeletal disease                | 221  | 21  |
| Disorders of the spine                     | 107  | 10  |
| Upper extremity disorders                  | 52   | 5   |
| Osteoarthritis                             | 16   | 1.5 |

\* Index score 5-10

**Table 2.** Number of observations and proportions (%) of primary health care visits due to musculoskeletal diseases by the exposure categories for physical heaviness of work between 2011 and 2014.

| Physical heaviness of work | Any musculoskeletal disease<br>N <sub>obs</sub> (%) | Disorders of the spine<br>N <sub>obs</sub> (%) | Upper extremity disorders<br>N <sub>obs</sub> (%) | Osteoarthritis<br>N <sub>obs</sub> (%) |
|----------------------------|-----------------------------------------------------|------------------------------------------------|---------------------------------------------------|----------------------------------------|
| All                        | 1083                                                | 527                                            | 253                                               | 79                                     |
| No exposure                | 405 (37)                                            | 168 (32)                                       | 66 (26)                                           | 44 (56)                                |
| Early exposure             | 137 (13)                                            | 64 (12)                                        | 34 (13)                                           | 20 (25)                                |
| Later exposure             | 156 (14)                                            | 102 (19)                                       | 40 (16)                                           | 5 (6)                                  |
| Inconsistent exposure      | 168 (16)                                            | 85 (16)                                        | 34 (13)                                           | 10 (13)                                |
| Early and later exposure   | 217 (20)                                            | 108 (21)                                       | 79 (31)                                           | 0 (0)                                  |
| Women                      | 730                                                 | 353                                            | 165                                               | 59                                     |
| No exposure                | 334 (46)                                            | 148 (42)                                       | 47 (28)                                           | 35 (58)                                |
| Early exposure             | 58 (8)                                              | 29 (8)                                         | 14 (8)                                            | 15 (25)                                |
| Later exposure             | 107 (15)                                            | 63 (18)                                        | 30 (18)                                           | 5 (8)                                  |
| Inconsistent exposure      | 128 (18)                                            | 55 (16)                                        | 34 (21)                                           | 5 (8)                                  |
| Early and later exposure   | 103 (14)                                            | 58 (16)                                        | 40 (24)                                           | 0 (0)                                  |
| Men                        | 353                                                 | 174                                            | 88                                                | 20                                     |
| No exposure                | 71 (20)                                             | 20 (11)                                        | 19 (22)                                           | 10 (50)                                |
| Early exposure             | 79 (22)                                             | 35 (20)                                        | 20 (23)                                           | 5 (25)                                 |
| Later exposure             | 49 (14)                                             | 39 (23)                                        | 10 (11)                                           | 0 (0)                                  |
| Inconsistent exposure      | 40 (11)                                             | 30 (17)                                        | 0 (0)                                             | 5 (25)                                 |
| Early and later exposure   | 115 (32)                                            | 50 (29)                                        | 39 (44)                                           | 0 (0)                                  |

**Table 3.** Risk ratios for primary health care visits due to musculoskeletal diseases in relation to early and later exposure to heavy physical work.

| Physical heaviness of work         | Model 1* |        |      | Model 2† |        |      |
|------------------------------------|----------|--------|------|----------|--------|------|
|                                    | RR       | 95% CI |      | RR       | 95% CI |      |
| <i>Any musculoskeletal disease</i> |          |        |      |          |        |      |
| No exposure                        | 1        |        |      | 1        |        |      |
| Early exposure                     | 1.65     | 1.12   | 2.41 | 1.55     | 1.05   | 2.28 |
| Later exposure                     | 1.57     | 1.09   | 2.24 | 1.46     | 1.01   | 2.12 |
| Inconsistent exposure              | 1.90     | 1.35   | 2.67 | 1.87     | 1.34   | 2.61 |
| Early and later exposure           | 2.14     | 1.55   | 2.97 | 1.99     | 1.44   | 2.77 |
| <i>Disorders of the spine</i>      |          |        |      |          |        |      |
| No exposure                        | 1        |        |      | 1        |        |      |
| Early exposure                     | 1.87     | 1.02   | 3.42 | 1.76     | 0.96   | 3.22 |
| Later exposure                     | 2.51     | 1.51   | 4.18 | 2.40     | 1.41   | 4.06 |
| Inconsistent exposure              | 2.32     | 1.35   | 3.99 | 2.30     | 1.34   | 3.95 |
| Early and later exposure           | 2.62     | 1.56   | 4.40 | 2.43     | 1.42   | 4.14 |
| <i>Upper extremity disorders</i>   |          |        |      |          |        |      |
| No exposure                        | 1        |        |      | 1        |        |      |
| Early exposure                     | 2.50     | 1.03   | 6.11 | 2.16     | 0.87   | 5.37 |
| Later exposure                     | 2.33     | 1.00   | 5.67 | 2.02     | 0.85   | 4.85 |
| Inconsistent exposure              | 2.33     | 0.96   | 5.67 | 2.26     | 0.94   | 5.43 |
| Early and later exposure           | 4.79     | 2.28   | 10.1 | 3.97     | 1.86   | 8.46 |

\* Model 1 adjusted for age and sex

† Model 2 adjusted for age, sex, smoking, BMI, physical activity and parental occupational class

1  
2  
3  
4  
5  
6  
7  
8  
9  
10  
11  
12  
13  
14  
15  
16  
17  
18  
19  
20  
21  
22  
23  
24  
25  
26  
27  
28  
29  
30  
31  
32  
33  
34  
35  
36  
37  
38  
39  
40  
41  
42  
43  
44  
45  
46  
47  
48  
49  
50  
51  
52  
53  
54  
55  
56  
57  
58  
59  
60

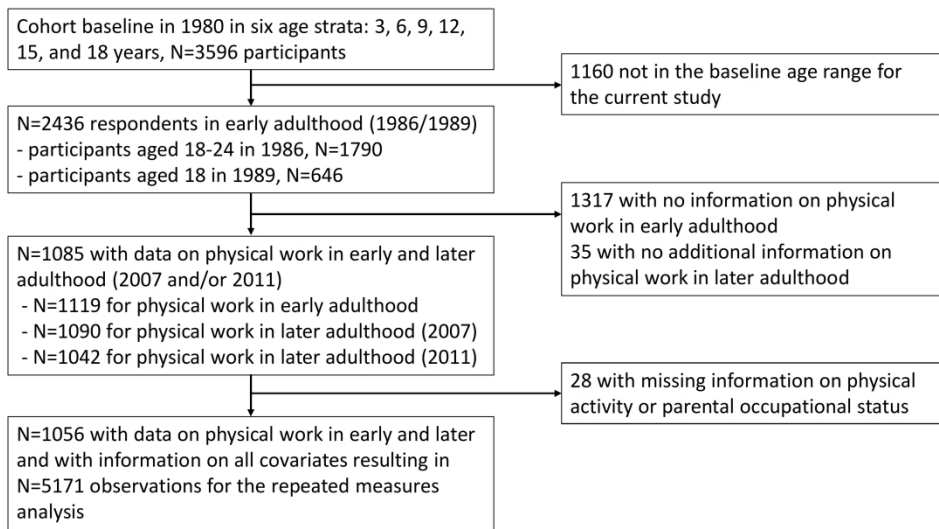

Figure 1. Flow chart of the sample selection.

1  
2  
3 **Supplemental material**  
4  
5  
6  
7

8 Exposure to heavy physical work from early to later adulthood and primary  
9  
10 health care visits due to musculoskeletal diseases in midlife: a register linked  
11  
12  
13 study  
14

15  
16 Jaana I. Halonen, Rahman Shiri, Minna Mänty, Hilla Sumanen, Svetlana Solovieva, Eira  
17 Viikari-Juntura, Mika Kähönen, Terho Lehtimäki, Olli T. Raitakari, Tea Lallukka  
18  
19  
20  
21  
22  
23  
24  
25  
26  
27  
28  
29  
30  
31  
32  
33  
34  
35  
36  
37  
38  
39  
40  
41  
42  
43  
44  
45  
46  
47  
48  
49  
50  
51  
52  
53  
54  
55  
56  
57  
58  
59  
60



**Supplemental Table 1.** Associations between early and later exposure to heavy physical work and primary health care visits due to musculoskeletal diseases from Cox proportional hazard models.

| Physical heaviness of work         | Model 1* |        |      | Model 2† |        |      |
|------------------------------------|----------|--------|------|----------|--------|------|
|                                    | HR       | 95% CI |      | HR       | 95% CI |      |
| <i>Any musculoskeletal disease</i> |          |        |      |          |        |      |
| No exposure                        | 1        |        |      | 1        |        |      |
| Early exposure                     | 1.95     | 1.22   | 3.11 | 1.90     | 1.18   | 3.06 |
| Later exposure                     | 1.36     | 0.84   | 2.22 | 1.32     | 0.81   | 2.16 |
| Inconsistent exposure              | 2.01     | 1.27   | 3.17 | 2.01     | 1.27   | 3.17 |
| Early and later exposure           | 2.41     | 1.56   | 3.73 | 2.26     | 1.45   | 3.52 |
| <i>Disorders of the spine</i>      |          |        |      |          |        |      |
| No exposure                        | 1        |        |      | 1        |        |      |
| Early exposure                     | 2.43     | 1.17   | 5.05 | 2.37     | 1.14   | 4.95 |
| Later exposure                     | 2.54     | 1.30   | 4.96 | 2.48     | 1.26   | 4.88 |
| Inconsistent exposure              | 2.36     | 1.15   | 4.85 | 2.38     | 1.15   | 4.89 |
| Early and later exposure           | 3.51     | 1.81   | 6.83 | 3.29     | 1.67   | 6.48 |
| <i>Upper extremity disorders</i>   |          |        |      |          |        |      |
| No exposure                        | 1        |        |      | 1        |        |      |
| Early exposure                     | 3.75     | 1.28   | 11.0 | 3.38     | 1.14   | 10.1 |
| Later exposure                     | 2.48     | 0.80   | 7.64 | 2.22     | 0.72   | 6.87 |
| Inconsistent exposure              | 2.46     | 0.74   | 8.17 | 2.27     | 0.68   | 7.62 |
| Early and later exposure           | 6.12     | 2.33   | 16.0 | 4.84     | 1.81   | 12.9 |

\* Model 1 adjusted for age and sex

† Model 2 adjusted for age, sex, smoking, BMI, and parental occupational class

1 STROBE Statement— Halonen JI et al. Exposure to heavy physical work from early to later  
 2  
 3 adulthood and primary health care visits due to musculoskeletal diseases in midlife: a register linked  
 4  
 5 study  
 6  
 7

|                              | Item No | Recommendation                                                                                                                                                                                                                                                                                                                                                                                                      |
|------------------------------|---------|---------------------------------------------------------------------------------------------------------------------------------------------------------------------------------------------------------------------------------------------------------------------------------------------------------------------------------------------------------------------------------------------------------------------|
| <b>Title and abstract</b>    | 1       | (a) Indicate the study's design with a commonly used term in the title or the abstract <b>SEE Abstract on p. 2</b><br>(b) Provide in the abstract an informative and balanced summary of what was done and what was found <b>SEE Abstract on p. 2</b>                                                                                                                                                               |
| <b>Introduction</b>          |         |                                                                                                                                                                                                                                                                                                                                                                                                                     |
| Background/rationale         | 2       | Explain the scientific background and rationale for the investigation being reported <b>SEE p. 4</b>                                                                                                                                                                                                                                                                                                                |
| Objectives                   | 3       | State specific objectives, including any pre-specified hypotheses <b>SEE p. 5</b>                                                                                                                                                                                                                                                                                                                                   |
| <b>Methods</b>               |         |                                                                                                                                                                                                                                                                                                                                                                                                                     |
| Study design                 | 4       | Present key elements of study design early in the paper <b>SEE p. 5 for description of the study cohort</b>                                                                                                                                                                                                                                                                                                         |
| Setting                      | 5       | Describe the setting, locations, and relevant dates, including periods of recruitment, exposure, follow-up, and data collection <b>SEE pp. 5-6 (setting), 6 (exposure), 6-7 (outcomes and follow-up)</b>                                                                                                                                                                                                            |
| Participants                 | 6       | (a) Give the eligibility criteria, and the sources and methods of selection of participants. Describe methods of follow-up <b>SEE p. 5</b><br>(b) For matched studies, give matching criteria and number of exposed and unexposed <b>NA</b>                                                                                                                                                                         |
| Variables                    | 7       | Clearly define all outcomes, exposures, predictors, potential confounders, and effect modifiers. Give diagnostic criteria, if applicable <b>SEE pp. 6 (exposure), 6-7 (outcome), 8 (covariates)</b>                                                                                                                                                                                                                 |
| Data sources/<br>measurement | 8*      | For each variable of interest, give sources of data and details of methods of assessment (measurement). Describe comparability of assessment methods if there is more than one group <b>SEE pp. 5 (setting), 6 (exposure), 6-7 (outcomes), 8 (covariates)</b>                                                                                                                                                       |
| Bias                         | 9       | Describe any efforts to address potential sources of bias <b>SEE pp. 8-9 (covariate adjustments and alternative analysis method)</b>                                                                                                                                                                                                                                                                                |
| Study size                   | 10      | Explain how the study size was arrived at <b>SEE p. 5 and Figure 1 (flow chart)</b>                                                                                                                                                                                                                                                                                                                                 |
| Quantitative variables       | 11      | Explain how quantitative variables were handled in the analyses. If applicable, describe which groupings were chosen and why <b>SEE pp. 6 (exposure), 6-7 (outcomes), 8 (covariates)</b>                                                                                                                                                                                                                            |
| Statistical methods          | 12      | (a) Describe all statistical methods, including those used to control for confounding <b>SEE pp. 8-9</b><br>(b) Describe any methods used to examine subgroups and interactions <b>SEE pp. 8-9</b><br>(c) Explain how missing data were addressed <b>SEE p. 8 (covariates)</b><br>(d) If applicable, explain how loss to follow-up was addressed <b>NA</b><br>(e) Describe any sensitivity analyses <b>SEE p. 9</b> |

## Results

|    |                          |     |                                                                                                                                                                                                                                 |
|----|--------------------------|-----|---------------------------------------------------------------------------------------------------------------------------------------------------------------------------------------------------------------------------------|
| 1  | Participants             | 13* | (a) Report numbers of individuals at each stage of study—eg numbers potentially eligible, examined for eligibility, confirmed eligible, included in the study, completing follow-up, and analysed <b>SEE p. 5 and Figure 1</b>  |
| 2  |                          |     | (b) Give reasons for non-participation at each stage <b>NA</b>                                                                                                                                                                  |
| 3  |                          |     | (c) Consider use of a flow diagram <b>Figure 1 is a flow diagram</b>                                                                                                                                                            |
| 4  |                          |     |                                                                                                                                                                                                                                 |
| 5  |                          |     |                                                                                                                                                                                                                                 |
| 6  |                          |     |                                                                                                                                                                                                                                 |
| 7  | Descriptive data         | 14* | (a) Give characteristics of study participants (eg demographic, clinical, social) and information on exposures and potential confounders <b>SEE p. 9 and Table 1</b>                                                            |
| 8  |                          |     | (b) Indicate number of participants with missing data for each variable of interest <b>Those with missing data were excluded, see page 5 and Figure 1.</b>                                                                      |
| 9  |                          |     | (c) Summarise follow-up time (eg, average and total amount) <b>NA</b>                                                                                                                                                           |
| 10 |                          |     |                                                                                                                                                                                                                                 |
| 11 |                          |     |                                                                                                                                                                                                                                 |
| 12 |                          |     |                                                                                                                                                                                                                                 |
| 13 |                          |     |                                                                                                                                                                                                                                 |
| 14 | Outcome data             | 15* | Report numbers of outcome events or summary measures over time <b>SEE Table 2.</b>                                                                                                                                              |
| 15 | Main results             | 16  | (a) Give unadjusted estimates and, if applicable, confounder-adjusted estimates and their precision (eg, 95% confidence interval). Make clear which confounders were adjusted for and why they were included <b>SEE Table 3</b> |
| 16 |                          |     | (b) Report category boundaries when continuous variables were categorized <b>See pp. 6 (exposure), 8 (covariates)</b>                                                                                                           |
| 17 |                          |     | (c) If relevant, consider translating estimates of relative risk into absolute risk for a meaningful time period <b>Unadjusted absolute risks provided in the abstract on page 2 and on page 9.</b>                             |
| 18 |                          |     |                                                                                                                                                                                                                                 |
| 19 |                          |     |                                                                                                                                                                                                                                 |
| 20 |                          |     |                                                                                                                                                                                                                                 |
| 21 |                          |     |                                                                                                                                                                                                                                 |
| 22 |                          |     |                                                                                                                                                                                                                                 |
| 23 |                          |     |                                                                                                                                                                                                                                 |
| 24 |                          |     |                                                                                                                                                                                                                                 |
| 25 | Other analyses           | 17  | Report other analyses done—eg analyses of subgroups and interactions, and sensitivity analyses <b>SEE p. 9 and supplemental Table 1.</b>                                                                                        |
| 26 |                          |     |                                                                                                                                                                                                                                 |
| 27 |                          |     |                                                                                                                                                                                                                                 |
| 28 | <b>Discussion</b>        |     |                                                                                                                                                                                                                                 |
| 29 | Key results              | 18  | Summarise key results with reference to study objectives <b>SEE p. 10</b>                                                                                                                                                       |
| 30 | Limitations              | 19  | Discuss limitations of the study, taking into account sources of potential bias or imprecision. Discuss both direction and magnitude of any potential bias <b>SEE pp. 11-12</b>                                                 |
| 31 |                          |     |                                                                                                                                                                                                                                 |
| 32 |                          |     |                                                                                                                                                                                                                                 |
| 33 |                          |     |                                                                                                                                                                                                                                 |
| 34 | Interpretation           | 20  | Give a cautious overall interpretation of results considering objectives, limitations, multiplicity of analyses, results from similar studies, and other relevant evidence <b>SEE p. 13</b>                                     |
| 35 |                          |     |                                                                                                                                                                                                                                 |
| 36 |                          |     |                                                                                                                                                                                                                                 |
| 37 |                          |     |                                                                                                                                                                                                                                 |
| 38 | Generalizability         | 21  | Discuss the generalizability (external validity) of the study results <b>SEE p. 12</b>                                                                                                                                          |
| 39 |                          |     |                                                                                                                                                                                                                                 |
| 40 | <b>Other information</b> |     |                                                                                                                                                                                                                                 |
| 41 | Funding                  | 22  | Give the source of funding and the role of the funders for the present study and, if applicable, for the original study on which the present article is based <b>SEE p. 14</b>                                                  |
| 42 |                          |     |                                                                                                                                                                                                                                 |
| 43 |                          |     |                                                                                                                                                                                                                                 |
| 44 |                          |     |                                                                                                                                                                                                                                 |

\*Give information separately for exposed and unexposed groups.

**Note:** An Explanation and Elaboration article discusses each checklist item and gives methodological background and published examples of transparent reporting. The STROBE checklist is best used in conjunction with this article (freely available on the Web sites of PLoS Medicine at <http://www.plosmedicine.org/>, Annals of Internal Medicine at <http://www.annals.org/>, and Epidemiology at <http://www.epidem.com/>). Information on the STROBE Initiative is available at <http://www.strobe-statement.org>.
