# Supplementary material for: Exposure to heavy physical work from early to later adulthood and primary healthcare visits due to musculoskeletal diseases in midlife: a register linked study
Source: PubMed Central journal article supplement — BMJ Open. 2019 Aug 27;9(8):e031564. doi: 10.1136/bmjopen-2019-031564 (PMC6720465; doi:10.1136/bmjopen-2019-031564), 2019-08-27
Supplement: bmjopen-2019-031564supp001.pdf [file bmjopen-2019-031564supp001.pdf]

**Supplemental material**

Exposure to heavy physical work from early to later adulthood and primary health care visits due to musculoskeletal diseases in midlife: a register linked study

Jaana I. Halonen, Rahman Shiri, Minna Mänty, Hilla Sumanen, Svetlana Solovieva, Eira Viikari-Juntura, Mika Kähönen, Terho Lehtimäki, Olli T. Raitakari, Tea Lallukka

**Supplemental Table 1.** Associations between early and later exposure to heavy physical work and primary health care visits due to musculoskeletal diseases from Cox proportional hazard models.

| Physical heaviness of work         | Model 1* |        |      | Model 2† |        |      |
|------------------------------------|----------|--------|------|----------|--------|------|
|                                    | HR       | 95% CI |      | HR       | 95% CI |      |
| <i>Any musculoskeletal disease</i> |          |        |      |          |        |      |
| No exposure                        | 1        |        |      | 1        |        |      |
| Early exposure                     | 1.95     | 1.22   | 3.11 | 1.90     | 1.18   | 3.06 |
| Later exposure                     | 1.36     | 0.84   | 2.22 | 1.32     | 0.81   | 2.16 |
| Inconsistent exposure              | 2.01     | 1.27   | 3.17 | 2.01     | 1.27   | 3.17 |
| Early and later exposure           | 2.41     | 1.56   | 3.73 | 2.26     | 1.45   | 3.52 |
| <i>Disorders of the spine</i>      |          |        |      |          |        |      |
| No exposure                        | 1        |        |      | 1        |        |      |
| Early exposure                     | 2.43     | 1.17   | 5.05 | 2.37     | 1.14   | 4.95 |
| Later exposure                     | 2.54     | 1.30   | 4.96 | 2.48     | 1.26   | 4.88 |
| Inconsistent exposure              | 2.36     | 1.15   | 4.85 | 2.38     | 1.15   | 4.89 |
| Early and later exposure           | 3.51     | 1.81   | 6.83 | 3.29     | 1.67   | 6.48 |
| <i>Upper extremity disorders</i>   |          |        |      |          |        |      |
| No exposure                        | 1        |        |      | 1        |        |      |
| Early exposure                     | 3.75     | 1.28   | 11.0 | 3.38     | 1.14   | 10.1 |
| Later exposure                     | 2.48     | 0.80   | 7.64 | 2.22     | 0.72   | 6.87 |
| Inconsistent exposure              | 2.46     | 0.74   | 8.17 | 2.27     | 0.68   | 7.62 |
| Early and later exposure           | 6.12     | 2.33   | 16.0 | 4.84     | 1.81   | 12.9 |

\*Model 1 adjusted for age and sex

† Model 2 adjusted for age, sex, smoking, BMI, and parental occupational class
